# Supplementary material for: Synthesis of P,P-bidentate caged phosphines via tungsten pentacarbonyl-promoted cycloaddition reactions of 1-alkyl-1,2-diphospholes
Source: Royal Society of Chemistry journal article supplement (doi:10.1039/d3nj05665a), 2024-01-01
Supplement: d3nj05665a1.pdf [file d3nj05665a1.pdf]

## Supporting information

for

### **Synthesis of *P,P*-bidentate caged phosphines via tungsten pentacarbonyl-promoted cycloaddition reactions of 1-alkyl-1,2-diphospholes**

Almaz A. Zagidullin,<sup>1</sup> Yulia S. Ganushevich,<sup>2</sup> Denis V. Korchagin,<sup>3</sup> Peter Lönnecke,<sup>4</sup>  
Evamarie Hey-Hawkins,<sup>4</sup> Vasili A. Miluykov<sup>1</sup>

<sup>1</sup>*Arbuzov Institute of Organic and Physical Chemistry, FRC Kazan Scientific Center of RAS,  
420088, Kazan, Russia.*

<sup>2</sup>*A.N. Nesmeyanov Institute of Organoelement Compounds of Russian Academy of Sciences,  
28 Vavilov St., 119334 Moscow, Russia*

<sup>3</sup>*Federal Research Center of Problems of Chemical Physics and Medicinal Chemistry,  
Chernogolovka, Moscow Region, Russia*

<sup>4</sup>*Institute of Inorganic Chemistry, Leipzig University, 04103 Leipzig, Germany*

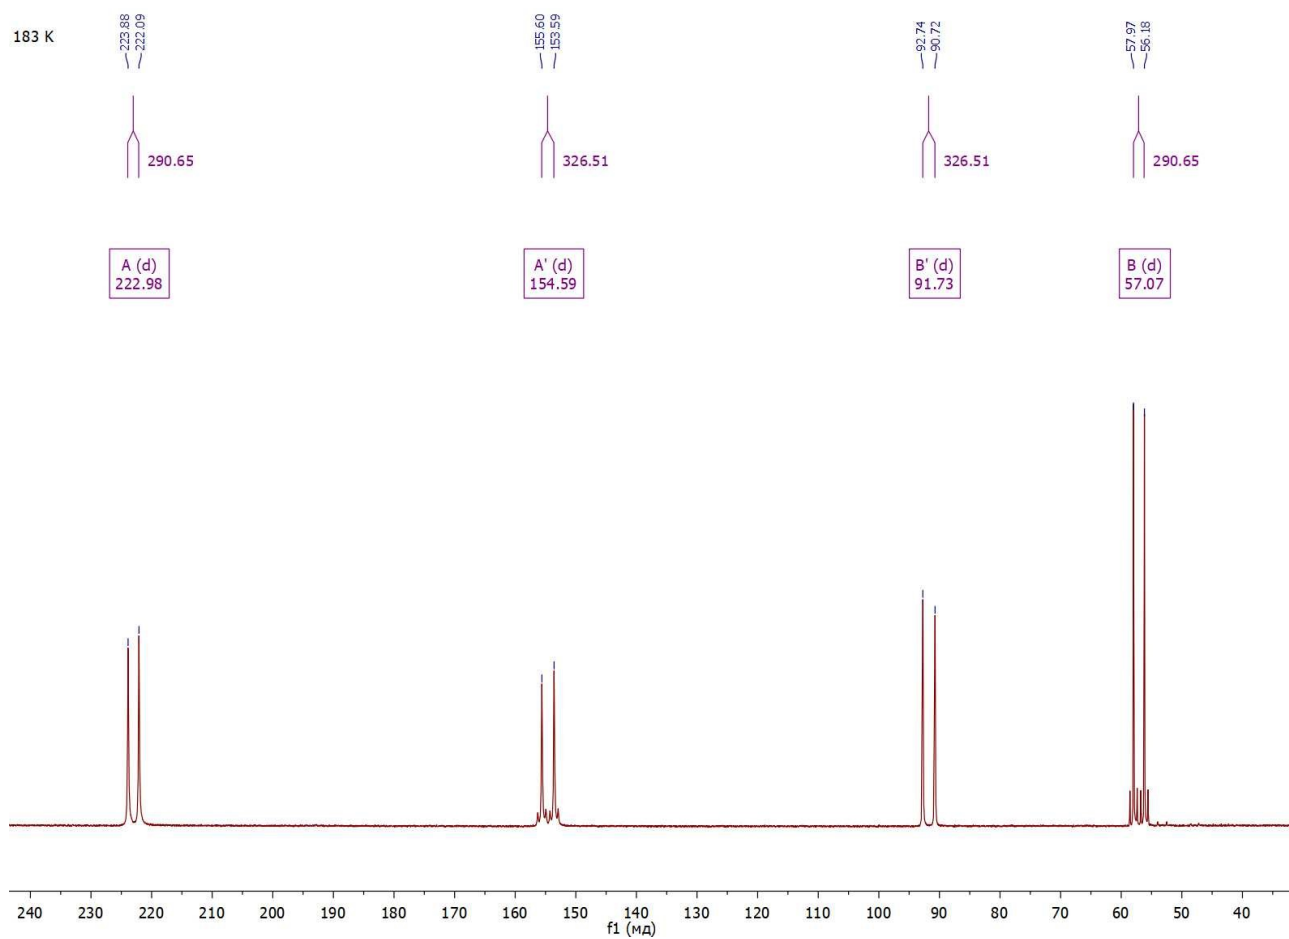

Figure S1.  $^{31}\text{P}\{^1\text{H}\}$  NMR spectrum of **2b** (162.0 MHz, -90 °C, THF- $d_8$ )

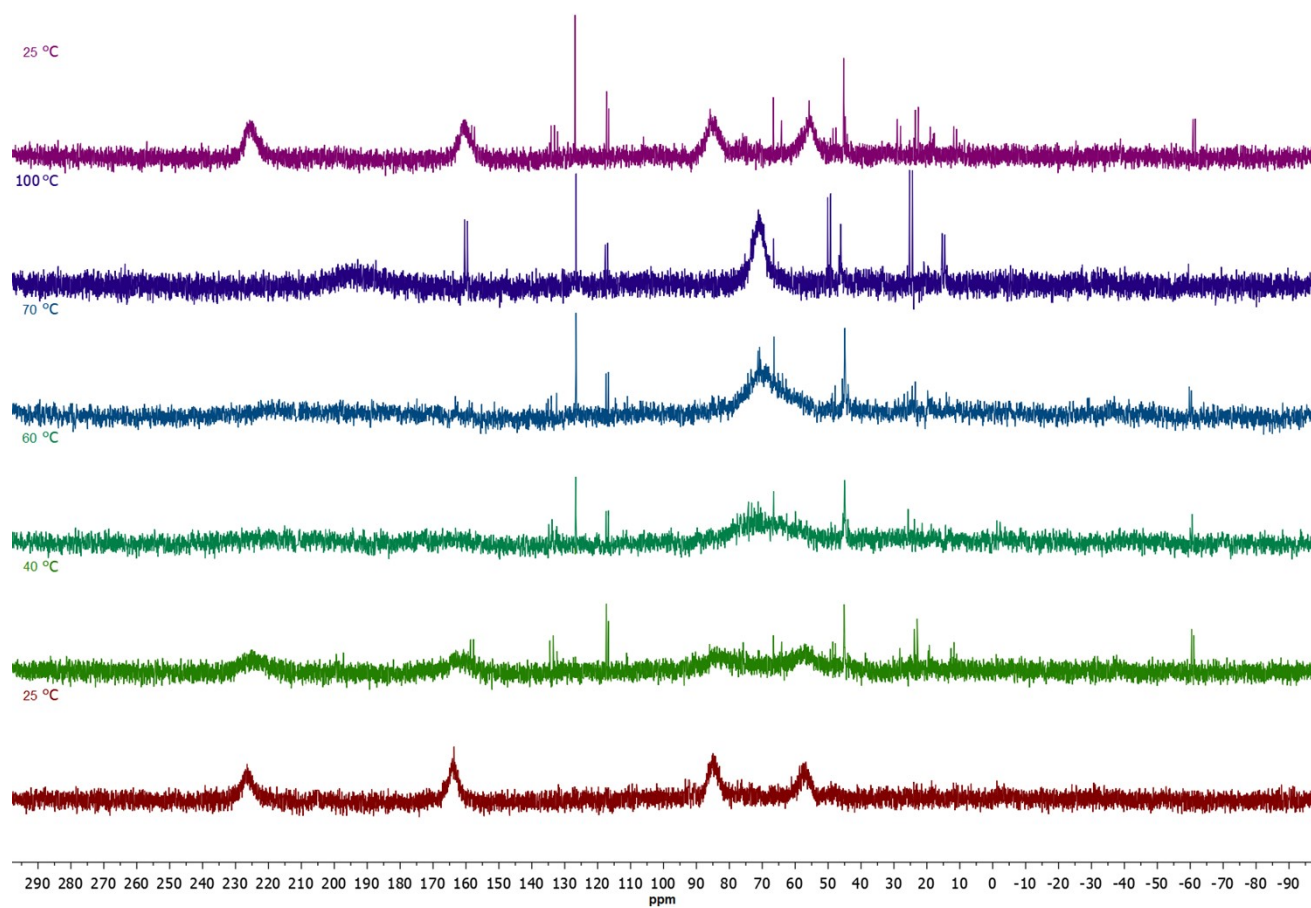

Figure S2. Variable-temperature  $^{31}\text{P}\{^1\text{H}\}$  NMR spectra of 2b/2b' (242.9 MHz, 25 to 100 °C, Toluene- $d_8$ )

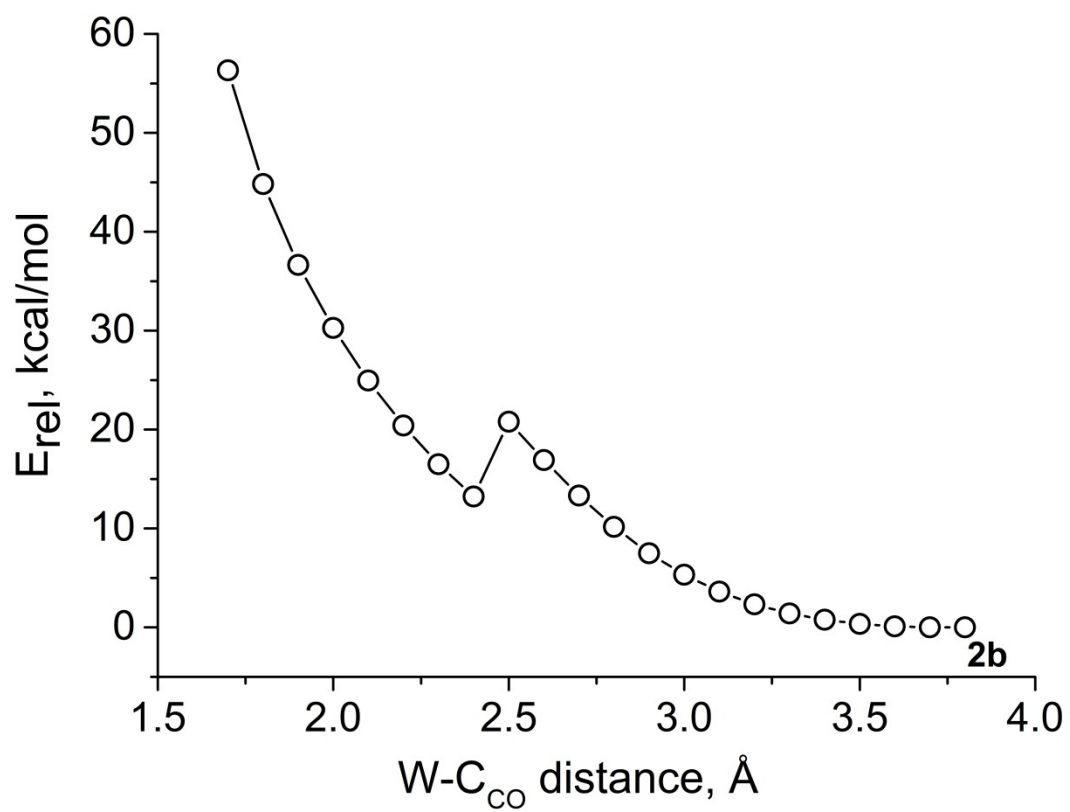

Figure S3. Energy profile of **2b** at  $W-C_{CO}$  distance

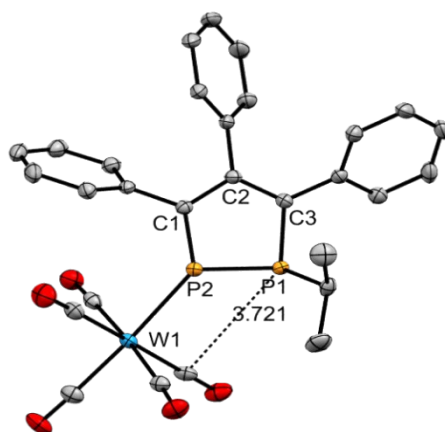

Figure S4. Molecular structure and labelling scheme of compound **2b**. Hydrogen atoms are omitted for clarity and displacement ellipsoids are drawn at the 50% probability level.

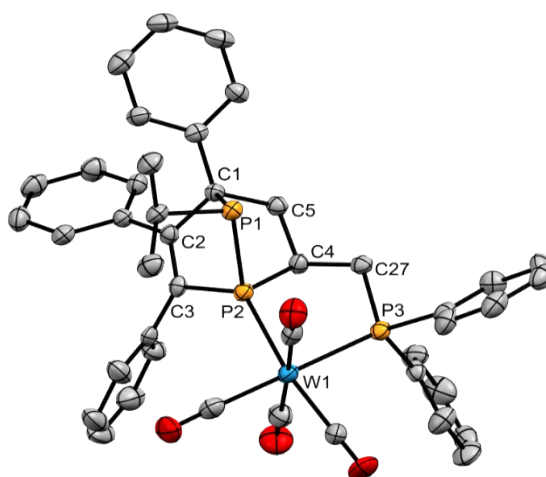

Figure S5. Molecular structure and labelling scheme of compound **3b**. Hydrogen atoms are omitted for clarity and displacement ellipsoids are drawn at the 50% probability level.

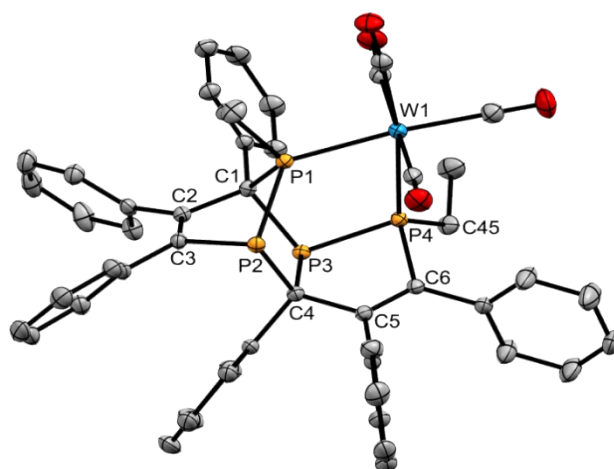

Figure S6. Molecular structure and labelling scheme of compound **4a**. Hydrogen atoms are omitted for clarity and displacement ellipsoids are drawn at the 50% probability level.

Table S1. Fundamental crystal structure parameters

| Compound                                       | <b>2b</b>                                                       | <b>3b</b>                                                                        | <b>4a</b>                                                       |
|------------------------------------------------|-----------------------------------------------------------------|----------------------------------------------------------------------------------|-----------------------------------------------------------------|
| Empirical formula                              | C <sub>29</sub> H <sub>22</sub> O <sub>5</sub> P <sub>2</sub> W | C <sub>53.50</sub> H <sub>49</sub> O <sub>4</sub> P <sub>3</sub> W               | C <sub>50</sub> H <sub>40</sub> O <sub>4</sub> P <sub>4</sub> W |
| Molecular formula                              | C <sub>29</sub> H <sub>22</sub> O <sub>5</sub> P <sub>2</sub> W | C <sub>43</sub> H <sub>37</sub> O <sub>4</sub> P <sub>3</sub> W<br>· 1.5 toluene | C <sub>50</sub> H <sub>40</sub> O <sub>4</sub> P <sub>4</sub> W |
| Formula weight                                 | 696.25                                                          | 1032.68                                                                          | 1012.55                                                         |
| Temperature [K]                                | 130(2)                                                          | 130(2)                                                                           | 130(2)                                                          |
| Crystal system                                 | Monoclinic                                                      | Monoclinic                                                                       | Triclinic                                                       |
| Space group                                    | <i>P</i> 2 <sub>1</sub> / <i>c</i>                              | <i>C</i> 2/ <i>c</i>                                                             | <i>P</i> $\bar{1}$                                              |
| Unit cell dimensions                           |                                                                 |                                                                                  |                                                                 |
| a [pm]                                         | 2184.84(3)                                                      | 3676.7(1)                                                                        | 1119.96(1)                                                      |
| b [pm]                                         | 662.65(1)                                                       | 930.53(2)                                                                        | 1257.70(2)                                                      |
| c [pm]                                         | 1952.50(3)                                                      | 2827.16(7)                                                                       | 1703.15(2)                                                      |
| $\alpha$ [deg]                                 | 90                                                              | 90                                                                               | 96.854(1)                                                       |
| $\beta$ [deg]                                  | 106.818(1)                                                      | 106.002(3)                                                                       | 105.569(1)                                                      |
| $\gamma$ [deg]                                 | 90                                                              | 90                                                                               | 108.354(1)                                                      |
| Volume [nm <sup>3</sup> ]                      | 2.70589(7)                                                      | 9.2976(4)                                                                        | 2.13821(5)                                                      |
| Z                                              | 4                                                               | 8                                                                                | 2                                                               |
| $\rho$ (calc.) [Mg/m <sup>3</sup> ]            | 1.709                                                           | 1.475                                                                            | 1.573                                                           |
| $\mu$ [mm <sup>-1</sup> ]                      | 4.424                                                           | 2.633                                                                            | 2.897                                                           |
| F(000)                                         | 1360                                                            | 4168                                                                             | 1012                                                            |
| Crystal size [mm <sup>3</sup> ]                | 0.38 · 0.25 · 0.20                                              | 0.32 · 0.07 · 0.05                                                               | 0.39 · 0.20 · 0.14                                              |
| $\Theta_{\min}$ - $\Theta_{\max}$ [deg]        | 1.947 - 30.507                                                  | 1.499 - 26.372                                                                   | 1.921 - 30.508                                                  |
|                                                | -31 ≤ h ≤ 24                                                    | -45 ≤ h ≤ 44                                                                     | -15 ≤ h ≤ 15                                                    |
| Index ranges                                   | -9 ≤ k ≤ 8                                                      | -11 ≤ k ≤ 11                                                                     | -17 ≤ k ≤ 17                                                    |
|                                                | -27 ≤ l ≤ 27                                                    | -35 ≤ l ≤ 35                                                                     | -24 ≤ l ≤ 24                                                    |
| Reflections collected                          | 29001                                                           | 39224                                                                            | 95272                                                           |
| Independent reflections [R <sub>(int)</sub> ]  | 8274 [0.0300]                                                   | 9519 [0.0742]                                                                    | 13023 [0.0386]                                                  |
| Completeness ( $\Theta$ [deg])                 | 100.0 % (30.51)                                                 | 100.0 % (26.37)                                                                  | 100.0 % (30.51)                                                 |
| T <sub>Min</sub> / T <sub>Max</sub>            | 1.00000 / 0.79968                                               | 1.00000 / 0.87423                                                                | 1.00000 / 0.85427                                               |
| Restraints / parameters                        | 0 / 336                                                         | 61 / 590                                                                         | 0 / 534                                                         |
| Goof [on F <sup>2</sup> ]                      | 1.077                                                           | 1.033                                                                            | 1.076                                                           |
| R1, wR2 [I > 2 $\sigma$ (I)]                   | 0.0221, 0.0448                                                  | 0.0414, 0.0836                                                                   | 0.0208, 0.0471                                                  |
| R1, wR2 (all data)                             | 0.0270, 0.0467                                                  | 0.0653, 0.0921                                                                   | 0.0235, 0.0480                                                  |
| Residual electron density [e·Å <sup>-3</sup> ] | 1.662 / -0.756                                                  | 1.332 / -0.669                                                                   | 1.240 / -0.675                                                  |
| Comments                                       | -                                                               | †                                                                                | -                                                               |
| CCDC deposition number                         | 2300839                                                         | 2300840                                                                          | 2300841                                                         |

†: The toluene solvent molecule is located disordered on a twofold axis.

Table S2. Cartesian coordinates and total energies of optimized structures **2b**, **2b'**, and **2b\_TS**

| <b>2b</b>                            |              |              |              |
|--------------------------------------|--------------|--------------|--------------|
|                                      |              |              |              |
| Charge : 0                           |              |              |              |
| Multiplicity : 1                     |              |              |              |
| Total energy: -18808.6908120454 a.u. |              |              |              |
| 74                                   | -2.890058000 | -0.285476000 | -0.175677000 |
| 15                                   | -0.407071000 | -0.349826000 | 0.286397000  |
| 15                                   | 0.955405000  | -1.896632000 | -0.420001000 |
| 8                                    | -2.416555000 | -2.509747000 | -2.437540000 |
| 8                                    | -3.419022000 | -2.620683000 | 1.954208000  |
| 8                                    | -5.960125000 | -0.287923000 | -0.949112000 |
| 8                                    | -3.532097000 | 1.871177000  | 2.110880000  |
| 8                                    | -2.409024000 | 2.064325000  | -2.313712000 |
| 6                                    | 0.814761000  | 0.900780000  | 0.176592000  |
| 6                                    | 2.189361000  | 0.481236000  | -0.026193000 |
| 6                                    | 2.438190000  | -0.884286000 | -0.218418000 |
| 6                                    | 1.112518000  | -3.315577000 | 0.827377000  |
| 1                                    | 2.012964000  | -3.839702000 | 0.434493000  |
| 6                                    | 1.382068000  | -2.869554000 | 2.266334000  |
| 1                                    | 0.516964000  | -2.313647000 | 2.681633000  |
| 1                                    | 2.277966000  | -2.222657000 | 2.339956000  |
| 1                                    | 1.551896000  | -3.758802000 | 2.910292000  |
| 6                                    | -0.094060000 | -4.255073000 | 0.707755000  |
| 1                                    | 0.085052000  | -5.171433000 | 1.307604000  |
| 1                                    | -0.284472000 | -4.565374000 | -0.338991000 |
| 1                                    | -1.019081000 | -3.786349000 | 1.100225000  |
| 6                                    | 0.401890000  | 2.323844000  | 0.250405000  |
| 6                                    | -0.354800000 | 2.800430000  | 1.345850000  |
| 1                                    | -0.593578000 | 2.114843000  | 2.172822000  |
| 6                                    | -0.782234000 | 4.134855000  | 1.398222000  |
| 1                                    | -1.372287000 | 4.482420000  | 2.259689000  |
| 6                                    | -0.460931000 | 5.018570000  | 0.356452000  |
| 1                                    | -0.798033000 | 6.065600000  | 0.394927000  |
| 6                                    | 0.293519000  | 4.559264000  | -0.736203000 |
| 1                                    | 0.545066000  | 5.244737000  | -1.559857000 |
| 6                                    | 0.724992000  | 3.227938000  | -0.789711000 |
| 1                                    | 1.306719000  | 2.873285000  | -1.652999000 |
| 6                                    | 3.293549000  | 1.488233000  | -0.036283000 |
| 6                                    | 3.471901000  | 2.384068000  | 1.041540000  |
| 1                                    | 2.783058000  | 2.343203000  | 1.898414000  |
| 6                                    | 4.520264000  | 3.315096000  | 1.030830000  |
| 1                                    | 4.647744000  | 4.000930000  | 1.882400000  |
| 6                                    | 5.401071000  | 3.376236000  | -0.061064000 |

|   |              |              |              |
|---|--------------|--------------|--------------|
| 1 | 6.220165000  | 4.111503000  | -0.070648000 |
| 6 | 5.228474000  | 2.496646000  | -1.141880000 |
| 1 | 5.910921000  | 2.541263000  | -2.004502000 |
| 6 | 4.186376000  | 1.558839000  | -1.128752000 |
| 1 | 4.053362000  | 0.870678000  | -1.977040000 |
| 6 | 3.753959000  | -1.550716000 | -0.272023000 |
| 6 | 4.775758000  | -1.239727000 | 0.661375000  |
| 1 | 4.595667000  | -0.463149000 | 1.418728000  |
| 6 | 5.999513000  | -1.919656000 | 0.637058000  |
| 1 | 6.775464000  | -1.664093000 | 1.374943000  |
| 6 | 6.238577000  | -2.924808000 | -0.315593000 |
| 1 | 7.203386000  | -3.454022000 | -0.332998000 |
| 6 | 5.237528000  | -3.247561000 | -1.245150000 |
| 1 | 5.415568000  | -4.027858000 | -2.000939000 |
| 6 | 4.010115000  | -2.570640000 | -1.223903000 |
| 1 | 3.238977000  | -2.809043000 | -1.973814000 |
| 6 | -2.574204000 | -1.696374000 | -1.622161000 |
| 6 | -3.216111000 | -1.771561000 | 1.183537000  |
| 6 | -4.831479000 | -0.287263000 | -0.656229000 |
| 6 | -3.269795000 | 1.099485000  | 1.281628000  |
| 6 | -2.569968000 | 1.219800000  | -1.534275000 |

**2b\_TS**

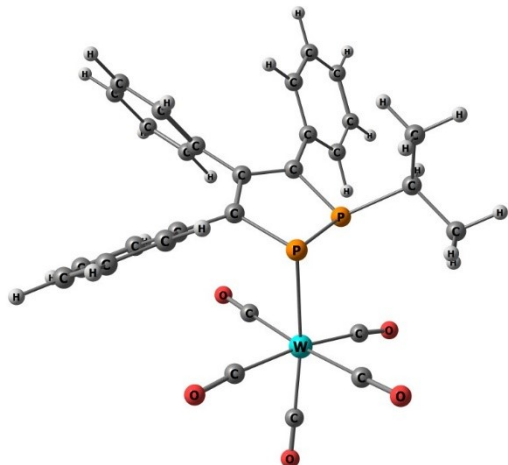

Charge : 0  
 Multiplicity : 1  
 Total energy: -18808.6746128868 a.u.

|    |              |              |              |
|----|--------------|--------------|--------------|
| 74 | -2.119554966 | -0.494996994 | -0.826435955 |
| 15 | -0.476472034 | -0.194853006 | 1.385403955  |
| 15 | 0.704551966  | -1.717176006 | 0.430180955  |
| 8  | -1.502455966 | -3.324958994 | -2.195143955 |
| 8  | -4.044685966 | -2.009294994 | 1.241203045  |
| 8  | -4.416937966 | -0.296501994 | -2.957152955 |
| 8  | -3.277712966 | 2.364189006  | 0.070656045  |
| 8  | 0.043640034  | 0.871448006  | -2.758371955 |
| 6  | 0.761154966  | 1.022858994  | 0.907209955  |
| 6  | 2.017565966  | 0.588196994  | 0.384403955  |
| 6  | 2.202813966  | -0.806621006 | 0.186041955  |
| 6  | 0.999300966  | -3.319093006 | 1.373105955  |
| 1  | 1.727391966  | -3.847509006 | 0.718876955  |
| 6  | 1.633700966  | -3.073564006 | 2.746203955  |
| 1  | 0.954836966  | -2.495181006 | 3.404900955  |
| 1  | 2.592279966  | -2.524861006 | 2.666587955  |
| 1  | 1.837732966  | -4.047650006 | 3.239805955  |
| 6  | -0.300207034 | -4.131463006 | 1.440378955  |
| 1  | -0.105624034 | -5.099117006 | 1.947057955  |
| 1  | -0.709522034 | -4.348870006 | 0.434715955  |
| 1  | -1.083203034 | -3.604937006 | 2.024212955  |
| 6  | 0.329408966  | 2.434666994  | 1.005708955  |



|   |              |              |              |
|---|--------------|--------------|--------------|
| 6 | -0.355111034 | 2.890592994  | 2.160074955  |
| 1 | -0.490349034 | 2.203575994  | 3.010253955  |
| 6 | -0.838187034 | 4.203187994  | 2.240088955  |
| 1 | -1.361185034 | 4.536980994  | 3.149133955  |
| 6 | -0.655837034 | 5.087759994  | 1.165779955  |
| 1 | -1.039332034 | 6.117676994  | 1.225308955  |
| 6 | 0.014755966  | 4.649227994  | 0.011597955  |
| 1 | 0.149798966  | 5.332508994  | -0.840719045 |
| 6 | 0.506514966  | 3.340942994  | -0.070267045 |
| 1 | 1.009166966  | 3.001607994  | -0.986632045 |
| 6 | 3.091410966  | 1.564875994  | 0.026312955  |
| 6 | 3.592192966  | 2.469425994  | 0.988082955  |
| 1 | 3.180668966  | 2.454657994  | 2.008686955  |
| 6 | 4.606409966  | 3.378000994  | 0.652541955  |
| 1 | 4.988965966  | 4.073848994  | 1.414949955  |
| 6 | 5.129951966  | 3.402922994  | -0.650124045 |
| 1 | 5.923243966  | 4.119064994  | -0.913744045 |
| 6 | 4.634239966  | 2.511770994  | -1.615664045 |
| 1 | 5.034332966  | 2.529755994  | -2.641017045 |
| 6 | 3.626142966  | 1.596708994  | -1.280641045 |
| 1 | 3.231623966  | 0.906396994  | -2.041212045 |
| 6 | 3.428058966  | -1.493619006 | -0.261639045 |
| 6 | 4.686830966  | -1.187079006 | 0.315785955  |
| 1 | 4.753637966  | -0.396001006 | 1.076428955  |
| 6 | 5.836232966  | -1.892112006 | -0.061744045 |
| 1 | 6.801756966  | -1.640970006 | 0.403626955  |
| 6 | 5.763865966  | -2.914153006 | -1.023448045 |
| 1 | 6.671194966  | -3.461753006 | -1.320055045 |
| 6 | 4.526148966  | -3.226664006 | -1.607271045 |
| 1 | 4.458321966  | -4.016147006 | -2.371354045 |
| 6 | 3.371681966  | -2.524975006 | -1.233339045 |
| 1 | 2.410078966  | -2.749846006 | -1.722226045 |
| 6 | -1.672079966 | -2.303804994 | -1.656568955 |
| 6 | -3.355113966 | -1.446681994 | 0.491551045  |
| 6 | -3.555843966 | -0.381406994 | -2.170422955 |
| 6 | -2.803978966 | 1.340583006  | -0.206597955 |
| 6 | -0.752475966 | 0.388494006  | -2.058171955 |

2b'

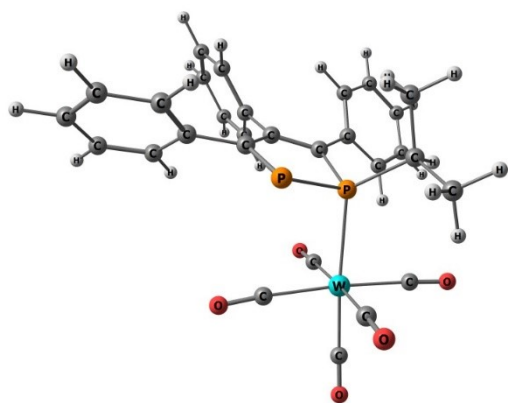

Charge : 0

Multiplicity : 1

Total energy: -18808.6881405080 a.u.

|    |              |              |              |
|----|--------------|--------------|--------------|
| 74 | -1.476487000 | -1.549899000 | -1.506433000 |
| 15 | -0.672515000 | 0.234485000  | 1.649484000  |
| 15 | 0.211110000  | -1.384929000 | 0.456100000  |
| 8  | -0.557053000 | -4.571920000 | -2.040756000 |
| 8  | -3.789859000 | -2.448078000 | 0.525955000  |
| 8  | -3.486045000 | -1.990607000 | -3.905594000 |
| 8  | -2.596988000 | 1.458884000  | -1.374766000 |
| 8  | 0.734529000  | -0.373643000 | -3.505856000 |

|   |              |              |              |
|---|--------------|--------------|--------------|
| 6 | 0.623356000  | 1.303487000  | 1.182783000  |
| 6 | 1.777437000  | 0.799494000  | 0.431850000  |
| 6 | 1.795778000  | -0.551706000 | 0.091104000  |
| 6 | 0.646444000  | -2.895762000 | 1.499752000  |
| 1 | 1.225709000  | -3.522053000 | 0.784912000  |
| 6 | 1.540972000  | -2.525603000 | 2.687673000  |
| 1 | 1.006708000  | -1.864353000 | 3.400122000  |
| 1 | 2.468924000  | -2.012883000 | 2.368596000  |
| 1 | 1.834834000  | -3.444892000 | 3.235803000  |
| 6 | -0.611934000 | -3.659291000 | 1.923273000  |
| 1 | -0.320857000 | -4.560046000 | 2.502020000  |
| 1 | -1.209542000 | -3.997443000 | 1.055640000  |
| 1 | -1.267996000 | -3.044140000 | 2.572952000  |
| 6 | 0.433662000  | 2.743676000  | 1.501253000  |
| 6 | 0.082694000  | 3.144083000  | 2.812902000  |
| 1 | 0.017773000  | 2.381966000  | 3.605302000  |
| 6 | -0.159781000 | 4.491692000  | 3.114062000  |
| 1 | -0.424143000 | 4.780937000  | 4.142698000  |
| 6 | -0.060738000 | 5.467179000  | 2.109973000  |
| 1 | -0.250770000 | 6.525547000  | 2.344975000  |
| 6 | 0.282311000  | 5.084280000  | 0.802427000  |
| 1 | 0.352370000  | 5.841262000  | 0.006375000  |
| 6 | 0.532140000  | 3.740097000  | 0.499476000  |
| 1 | 0.785854000  | 3.451002000  | -0.530551000 |
| 6 | 2.888191000  | 1.720075000  | 0.044020000  |
| 6 | 3.562391000  | 2.501405000  | 1.008961000  |
| 1 | 3.264063000  | 2.434378000  | 2.065917000  |
| 6 | 4.611062000  | 3.352059000  | 0.631043000  |
| 1 | 5.131574000  | 3.948328000  | 1.396081000  |
| 6 | 4.992803000  | 3.448085000  | -0.716937000 |
| 1 | 5.811912000  | 4.121216000  | -1.012952000 |
| 6 | 4.321039000  | 2.685117000  | -1.685906000 |
| 1 | 4.609077000  | 2.760077000  | -2.745671000 |
| 6 | 3.279924000  | 1.824759000  | -1.309989000 |
| 1 | 2.752586000  | 1.229666000  | -2.071154000 |
| 6 | 2.938253000  | -1.329349000 | -0.429188000 |
| 6 | 4.257488000  | -1.080774000 | 0.034031000  |
| 1 | 4.432692000  | -0.275738000 | 0.761262000  |
| 6 | 5.334333000  | -1.858541000 | -0.406979000 |
| 1 | 6.345331000  | -1.646943000 | -0.026255000 |
| 6 | 5.131210000  | -2.905376000 | -1.321935000 |
| 1 | 5.980752000  | -3.512735000 | -1.669199000 |
| 6 | 3.833112000  | -3.173575000 | -1.782686000 |
| 1 | 3.656258000  | -3.991209000 | -2.497927000 |
| 6 | 2.751532000  | -2.401101000 | -1.338873000 |
| 1 | 1.743097000  | -2.619243000 | -1.717806000 |
| 6 | -0.873109000 | -3.472757000 | -1.818677000 |
| 6 | -2.932948000 | -2.136480000 | -0.196202000 |
| 6 | -2.748826000 | -1.815821000 | -3.018713000 |
| 6 | -2.169039000 | 0.379311000  | -1.359324000 |
| 6 | -0.056905000 | -0.825593000 | -2.781551000 |

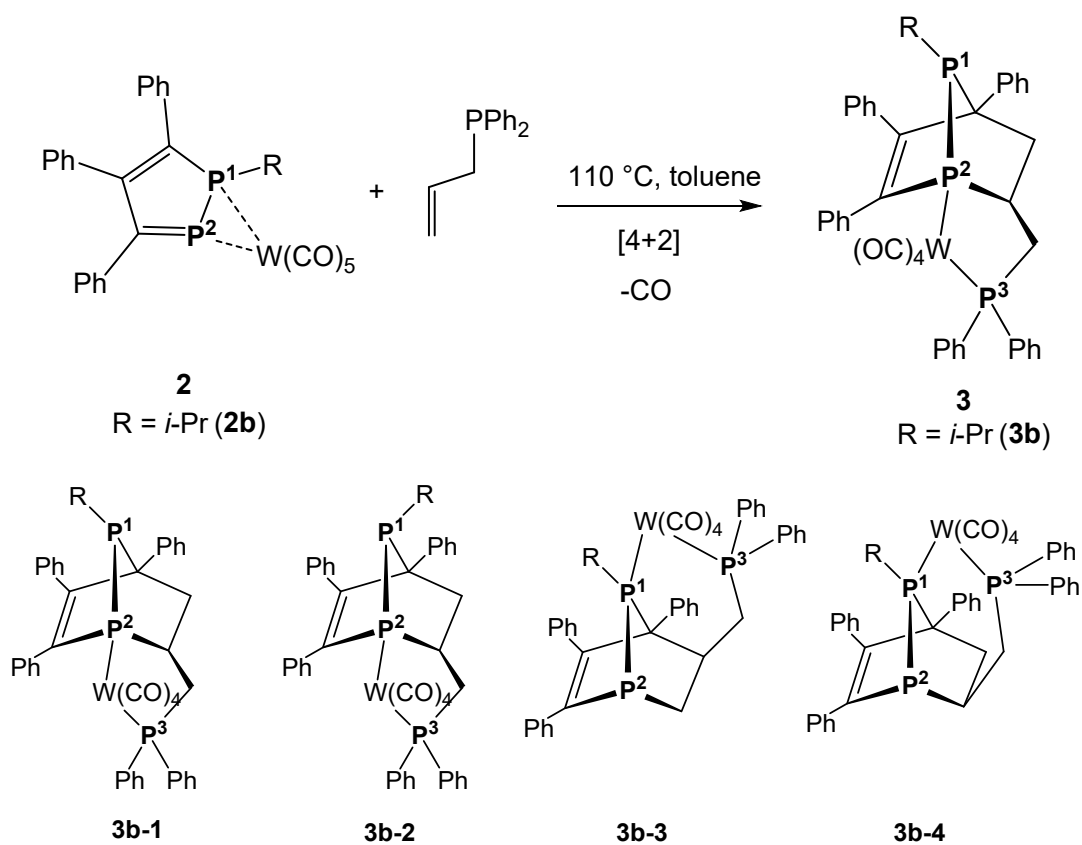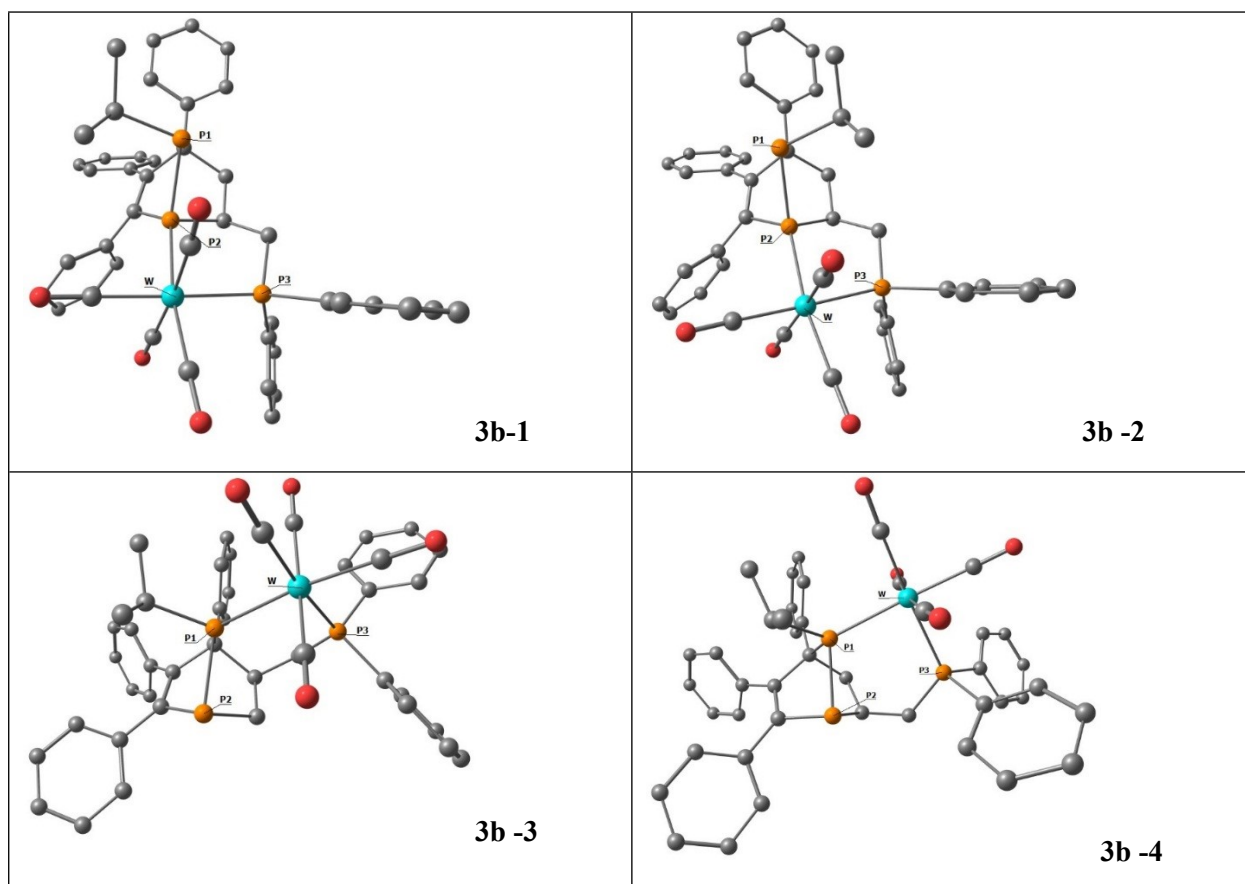

Figure S7. Optimized geometries of possible isomers of [4+2] cycloaddition reaction of complex **2b** with allyldiphenylphosphine. H atoms are omitted for clarity.

Table S3. Total and relative energies of possible isomers of **3b**

| Compound    | $E_{\text{Tot}}$ , a.u. | $E_{\text{rel}}$ , kcal/mol |
|-------------|-------------------------|-----------------------------|
| <b>3b-1</b> | -19617.77306360         | 0.0                         |
| <b>3b-2</b> | -19617.77240139         | 0.42                        |
| <b>3b-3</b> | -19617.76296781         | 6.34                        |
| <b>3b-4</b> | -19617.76460584         | 5.31                        |

Table S4. Cartesian coordinates and total energies of possible stereoisomers of complex **2b** with allyldiphenylphosphine

| <b>3b-1</b>                        |              |              |              |
|------------------------------------|--------------|--------------|--------------|
|                                    |              |              |              |
| Charge : 0                         |              |              |              |
| Multiplicity : 1                   |              |              |              |
| Total energy: -19617.77306360 a.u. |              |              |              |
| 74                                 | 26.382229000 | 1.229597000  | 17.639615000 |
| 15                                 | 26.748998000 | 3.065588000  | 15.972243000 |
| 15                                 | 25.673831000 | 3.426725000  | 14.039955000 |
| 15                                 | 24.951905000 | 3.054061000  | 18.659630000 |
| 8                                  | 24.100866000 | 0.023904000  | 15.748705000 |
| 8                                  | 25.571517000 | -0.746281000 | 19.972409000 |
| 8                                  | 28.883669000 | 2.157021000  | 19.417322000 |
| 8                                  | 28.331843000 | -0.887786000 | 16.326783000 |
| 6                                  | 26.605599000 | 5.138878000  | 14.168410000 |
| 6                                  | 28.089358000 | 4.880259000  | 14.510441000 |
| 6                                  | 28.336474000 | 3.856950000  | 15.389049000 |
| 6                                  | 26.049828000 | 4.721173000  | 16.651149000 |
| 1                                  | 26.849765000 | 5.065462000  | 17.339885000 |
| 6                                  | 25.903116000 | 5.695617000  | 15.458629000 |
| 1                                  | 26.314742000 | 6.697118000  | 15.702872000 |
| 1                                  | 24.824835000 | 5.836625000  | 15.245302000 |
| 6                                  | 26.346291000 | 5.958070000  | 12.910943000 |
| 6                                  | 27.120262000 | 5.742739000  | 11.745773000 |
| 1                                  | 27.936757000 | 5.007215000  | 11.767284000 |
| 6                                  | 26.876883000 | 6.454819000  | 10.564231000 |
| 1                                  | 27.501068000 | 6.263745000  | 9.677876000  |
| 6                                  | 25.848852000 | 7.409684000  | 10.510749000 |
| 1                                  | 25.657806000 | 7.972248000  | 9.584352000  |
| 6                                  | 25.072265000 | 7.639606000  | 11.654614000 |
| 1                                  | 24.263523000 | 8.386236000  | 11.632910000 |
| 6                                  | 25.319583000 | 6.925581000  | 12.838301000 |
| 1                                  | 24.692588000 | 7.137316000  | 13.715144000 |
| 6                                  | 29.167621000 | 5.784416000  | 14.023411000 |
| 6                                  | 29.012404000 | 7.190604000  | 14.033949000 |
| 1                                  | 28.069369000 | 7.634045000  | 14.385226000 |
| 6                                  | 30.047155000 | 8.032249000  | 13.602622000 |
| 1                                  | 29.905929000 | 9.123652000  | 13.628833000 |
| 6                                  | 31.252898000 | 7.489105000  | 13.131612000 |
| 1                                  | 32.061492000 | 8.150647000  | 12.785211000 |
| 6                                  | 31.415266000 | 6.094519000  | 13.098538000 |
| 1                                  | 32.352477000 | 5.656188000  | 12.722639000 |
| 6                                  | 30.387300000 | 5.252389000  | 13.542212000 |
| 1                                  | 30.521687000 | 4.161134000  | 13.511728000 |
| 6                                  | 29.607862000 | 3.524928000  | 16.071856000 |

|             |                                                                      |              |              |
|-------------|----------------------------------------------------------------------|--------------|--------------|
| 6           | 30.119562000                                                         | 2.207263000  | 16.032419000 |
| 1           | 29.585136000                                                         | 1.432417000  | 15.464309000 |
| 6           | 31.303563000                                                         | 1.878592000  | 16.706974000 |
| 1           | 31.683522000                                                         | 0.846671000  | 16.662698000 |
| 6           | 31.989782000                                                         | 2.854944000  | 17.445919000 |
| 1           | 32.912176000                                                         | 2.592829000  | 17.986222000 |
| 6           | 31.487944000                                                         | 4.165473000  | 17.500954000 |
| 1           | 32.016191000                                                         | 4.934751000  | 18.084859000 |
| 6           | 30.310361000                                                         | 4.499435000  | 16.819452000 |
| 1           | 29.920007000                                                         | 5.527222000  | 16.864403000 |
| 6           | 26.641468000                                                         | 2.387856000  | 12.781815000 |
| 1           | 27.668930000                                                         | 2.807826000  | 12.721895000 |
| 6           | 25.943957000                                                         | 2.502203000  | 11.415786000 |
| 1           | 26.519322000                                                         | 1.940512000  | 10.649409000 |
| 1           | 25.848575000                                                         | 3.548432000  | 11.066369000 |
| 1           | 24.925279000                                                         | 2.063776000  | 11.455499000 |
| 6           | 26.725701000                                                         | 0.921575000  | 13.227677000 |
| 1           | 25.721140000                                                         | 0.493040000  | 13.424775000 |
| 1           | 27.329862000                                                         | 0.787460000  | 14.145539000 |
| 1           | 27.191806000                                                         | 0.312209000  | 12.425055000 |
| 6           | 24.763733000                                                         | 4.466931000  | 17.439615000 |
| 1           | 23.950597000                                                         | 4.141009000  | 16.756662000 |
| 1           | 24.401223000                                                         | 5.378503000  | 17.959963000 |
| 6           | 23.188238000                                                         | 2.769411000  | 19.162955000 |
| 6           | 22.543831000                                                         | 1.560084000  | 18.839289000 |
| 1           | 23.100237000                                                         | 0.770467000  | 18.314745000 |
| 6           | 21.198619000                                                         | 1.358704000  | 19.189410000 |
| 1           | 20.706827000                                                         | 0.408184000  | 18.932597000 |
| 6           | 20.488806000                                                         | 2.360701000  | 19.867326000 |
| 1           | 19.435322000                                                         | 2.200715000  | 20.143717000 |
| 6           | 21.128568000                                                         | 3.566425000  | 20.201522000 |
| 1           | 20.578569000                                                         | 4.352235000  | 20.742042000 |
| 6           | 22.471940000                                                         | 3.769755000  | 19.856060000 |
| 1           | 22.970729000                                                         | 4.709055000  | 20.142250000 |
| 6           | 25.641618000                                                         | 3.832479000  | 20.195109000 |
| 6           | 25.801582000                                                         | 3.001929000  | 21.326879000 |
| 1           | 25.503840000                                                         | 1.942949000  | 21.277894000 |
| 6           | 26.337385000                                                         | 3.515660000  | 22.515121000 |
| 1           | 26.452535000                                                         | 2.856363000  | 23.388921000 |
| 6           | 26.733225000                                                         | 4.861859000  | 22.589360000 |
| 1           | 27.161069000                                                         | 5.262096000  | 23.521079000 |
| 6           | 26.584988000                                                         | 5.691328000  | 21.468899000 |
| 1           | 26.895157000                                                         | 6.746543000  | 21.516889000 |
| 6           | 26.039517000                                                         | 5.181431000  | 20.278035000 |
| 1           | 25.929725000                                                         | 5.853461000  | 19.413959000 |
| 6           | 24.904722000                                                         | 0.492054000  | 16.457051000 |
| 6           | 25.875582000                                                         | -0.025815000 | 19.099620000 |
| 6           | 27.968099000                                                         | 1.856282000  | 18.763314000 |
| 6           | 27.607519000                                                         | -0.102330000 | 16.809280000 |
| <b>3b-2</b> | Charge : 0<br>Multiplicity : 1<br>Total energy: -19617.77240139 a.u. |              |              |

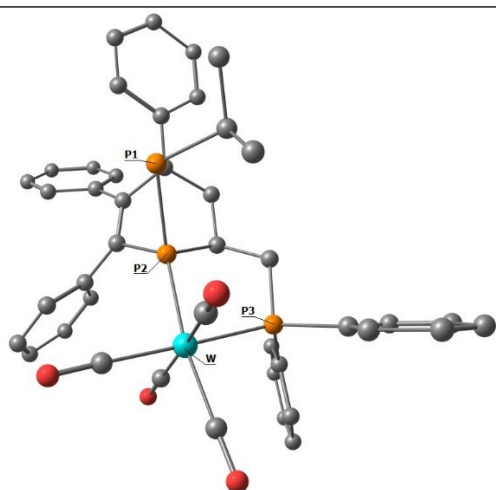

|    |              |              |              |
|----|--------------|--------------|--------------|
| 74 | 26.448647000 | 1.401923000  | 17.807890000 |
| 15 | 26.721943000 | 3.245121000  | 16.112937000 |
| 15 | 25.958933000 | 3.588637000  | 14.020138000 |
| 15 | 24.998445000 | 3.212839000  | 18.836933000 |
| 8  | 24.276434000 | -0.296800000 | 16.193028000 |
| 8  | 25.837911000 | -0.467776000 | 20.280285000 |
| 8  | 28.971367000 | 2.452964000  | 19.479484000 |
| 8  | 28.444362000 | -0.702991000 | 16.545581000 |
| 6  | 26.638231000 | 5.380545000  | 14.370162000 |
| 6  | 28.116636000 | 5.047315000  | 14.657808000 |
| 6  | 28.328119000 | 3.984918000  | 15.501093000 |
| 6  | 26.107337000 | 4.904681000  | 16.847968000 |
| 1  | 26.937178000 | 5.201401000  | 17.523982000 |
| 6  | 25.977478000 | 5.907771000  | 15.683376000 |
| 1  | 26.434967000 | 6.882870000  | 15.954633000 |
| 1  | 24.904425000 | 6.113696000  | 15.492453000 |
| 6  | 26.388773000 | 6.244542000  | 13.142470000 |
| 6  | 26.942877000 | 5.864445000  | 11.896676000 |
| 1  | 27.568402000 | 4.960901000  | 11.839682000 |
| 6  | 26.704447000 | 6.611626000  | 10.737338000 |
| 1  | 27.149573000 | 6.290355000  | 9.783212000  |
| 6  | 25.900951000 | 7.763451000  | 10.788530000 |
| 1  | 25.710322000 | 8.350455000  | 9.877267000  |
| 6  | 25.347418000 | 8.157211000  | 12.014175000 |
| 1  | 24.719090000 | 9.059389000  | 12.072635000 |
| 6  | 25.590804000 | 7.407909000  | 13.178283000 |
| 1  | 25.147373000 | 7.750092000  | 14.123827000 |
| 6  | 29.219392000 | 5.865913000  | 14.087154000 |
| 6  | 29.177469000 | 7.279263000  | 14.123639000 |
| 1  | 28.312591000 | 7.789357000  | 14.572534000 |
| 6  | 30.229585000 | 8.042855000  | 13.599288000 |
| 1  | 30.180199000 | 9.141583000  | 13.646242000 |
| 6  | 31.337066000 | 7.411893000  | 13.010851000 |
| 1  | 32.159060000 | 8.012386000  | 12.592106000 |
| 6  | 31.384905000 | 6.009597000  | 12.953994000 |
| 1  | 32.244242000 | 5.504499000  | 12.486880000 |
| 6  | 30.340226000 | 5.244452000  | 13.489036000 |
| 1  | 30.380890000 | 4.146702000  | 13.438841000 |
| 6  | 29.621008000 | 3.543856000  | 16.073571000 |
| 6  | 30.059295000 | 2.209303000  | 15.920515000 |
| 1  | 29.450022000 | 1.500043000  | 15.342497000 |
| 6  | 31.266457000 | 1.783083000  | 16.491567000 |
| 1  | 31.585807000 | 0.737740000  | 16.363252000 |

|             |                                                                      |             |              |
|-------------|----------------------------------------------------------------------|-------------|--------------|
| 6           | 32.053321000                                                         | 2.679831000 | 17.231559000 |
| 1           | 32.995591000                                                         | 2.341689000 | 17.689095000 |
| 6           | 31.628326000                                                         | 4.008568000 | 17.391754000 |
| 1           | 32.236670000                                                         | 4.716248000 | 17.975639000 |
| 6           | 30.424699000                                                         | 4.438611000 | 16.817701000 |
| 1           | 30.092279000                                                         | 5.479499000 | 16.948689000 |
| 6           | 24.066008000                                                         | 3.783605000 | 14.037976000 |
| 6           | 24.837736000                                                         | 4.680845000 | 17.672252000 |
| 1           | 23.981997000                                                         | 4.421740000 | 17.015210000 |
| 1           | 24.538361000                                                         | 5.585253000 | 18.242653000 |
| 6           | 23.222632000                                                         | 2.933377000 | 19.300324000 |
| 6           | 22.555580000                                                         | 1.769902000 | 18.871819000 |
| 1           | 23.103133000                                                         | 1.011106000 | 18.294971000 |
| 6           | 21.199706000                                                         | 1.575331000 | 19.183275000 |
| 1           | 20.690408000                                                         | 0.659699000 | 18.846120000 |
| 6           | 20.502139000                                                         | 2.538752000 | 19.926813000 |
| 1           | 19.440803000                                                         | 2.383496000 | 20.174398000 |
| 6           | 21.163894000                                                         | 3.699066000 | 20.363550000 |
| 1           | 20.622661000                                                         | 4.453987000 | 20.954618000 |
| 6           | 22.517750000                                                         | 3.895547000 | 20.056458000 |
| 1           | 23.033928000                                                         | 4.797924000 | 20.419866000 |
| 6           | 25.673232000                                                         | 3.929288000 | 20.408473000 |
| 6           | 25.708027000                                                         | 3.092661000 | 21.546568000 |
| 1           | 25.316702000                                                         | 2.065278000 | 21.487859000 |
| 6           | 26.240518000                                                         | 3.560023000 | 22.755420000 |
| 1           | 26.257588000                                                         | 2.896729000 | 23.633638000 |
| 6           | 26.756451000                                                         | 4.863879000 | 22.845445000 |
| 1           | 27.180126000                                                         | 5.227199000 | 23.794032000 |
| 6           | 26.734107000                                                         | 5.697487000 | 21.718571000 |
| 1           | 27.140155000                                                         | 6.719046000 | 21.777900000 |
| 6           | 26.194148000                                                         | 5.234760000 | 20.506271000 |
| 1           | 26.189733000                                                         | 5.909216000 | 19.636995000 |
| 6           | 25.024000000                                                         | 0.392081000 | 16.771980000 |
| 6           | 26.067807000                                                         | 0.211353000 | 19.353209000 |
| 6           | 28.043595000                                                         | 2.123765000 | 18.857003000 |
| 6           | 27.710557000                                                         | 0.087818000 | 17.000313000 |
| 6           | 23.617002000                                                         | 4.076393000 | 12.595679000 |
| 1           | 23.882631000                                                         | 3.238131000 | 11.918330000 |
| 1           | 22.512985000                                                         | 4.195892000 | 12.561466000 |
| 1           | 24.069549000                                                         | 5.000261000 | 12.185271000 |
| 6           | 23.385264000                                                         | 2.523877000 | 14.585497000 |
| 1           | 22.285755000                                                         | 2.594368000 | 14.446110000 |
| 1           | 23.725219000                                                         | 1.606384000 | 14.062279000 |
| 1           | 23.577510000                                                         | 2.375445000 | 15.665186000 |
| 1           | 23.791613000                                                         | 4.649202000 | 14.677898000 |
| <b>3b-3</b> | Charge : 0<br>Multiplicity : 1<br>Total energy: -19617.76296781 a.u. |             |              |



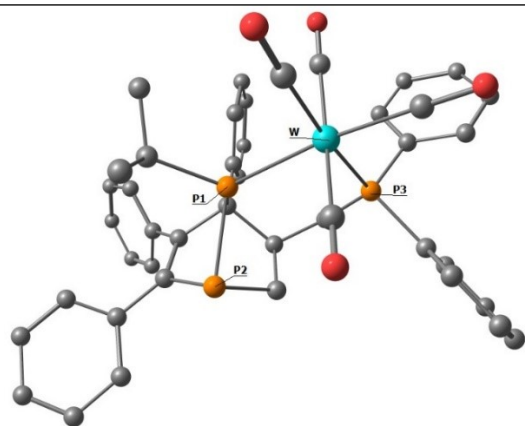

|    |              |              |              |
|----|--------------|--------------|--------------|
| 6  | -3.857023000 | -3.302001000 | 0.319020000  |
| 6  | -3.750654000 | -1.819894000 | 0.750083000  |
| 6  | -3.971006000 | -0.888850000 | -0.235071000 |
| 6  | -3.349944000 | -1.446081000 | 2.137077000  |
| 6  | -4.149703000 | -1.786183000 | 3.252681000  |
| 6  | -2.158348000 | -0.719720000 | 2.361655000  |
| 6  | -3.774662000 | -1.401692000 | 4.547623000  |
| 1  | -5.079357000 | -2.354272000 | 3.100347000  |
| 6  | -1.777640000 | -0.347232000 | 3.658961000  |
| 1  | -1.529668000 | -0.442064000 | 1.502003000  |
| 6  | -2.585484000 | -0.684503000 | 4.756641000  |
| 1  | -4.415910000 | -1.668963000 | 5.401493000  |
| 1  | -0.843611000 | 0.214876000  | 3.812657000  |
| 1  | -2.288844000 | -0.388968000 | 5.774616000  |
| 6  | -3.962441000 | 0.587276000  | -0.109321000 |
| 6  | -3.448751000 | 1.384029000  | -1.161825000 |
| 6  | -4.504298000 | 1.252259000  | 1.018667000  |
| 6  | -3.445888000 | 2.783135000  | -1.079082000 |
| 1  | -3.042217000 | 0.893813000  | -2.060760000 |
| 6  | -4.512405000 | 2.650935000  | 1.094238000  |
| 1  | -4.935695000 | 0.662297000  | 1.839590000  |
| 6  | -3.976949000 | 3.424288000  | 0.050980000  |
| 1  | -3.031486000 | 3.376690000  | -1.908439000 |
| 1  | -4.947847000 | 3.142962000  | 1.977644000  |
| 1  | -3.983446000 | 4.523121000  | 0.114371000  |
| 6  | -3.794308000 | -4.310198000 | 1.464804000  |
| 6  | -2.620043000 | -4.416220000 | 2.250623000  |
| 6  | -4.849464000 | -5.193197000 | 1.758624000  |
| 6  | -2.517187000 | -5.357904000 | 3.283224000  |
| 1  | -1.768966000 | -3.745621000 | 2.061095000  |
| 6  | -4.753123000 | -6.142067000 | 2.791469000  |
| 1  | -5.765896000 | -5.160084000 | 1.158469000  |
| 6  | -3.585632000 | -6.227293000 | 3.561344000  |
| 1  | -1.592479000 | -5.410581000 | 3.878180000  |
| 1  | -5.598692000 | -6.821215000 | 2.977685000  |
| 1  | -3.504303000 | -6.967841000 | 4.371648000  |
| 15 | -4.376509000 | -1.635594000 | -1.899103000 |
| 15 | -5.406329000 | -3.355620000 | -0.858673000 |
| 6  | -6.837647000 | -2.439661000 | -0.000797000 |
| 6  | -7.676468000 | -3.329051000 | 0.925373000  |
| 6  | -7.716403000 | -1.770398000 | -1.069912000 |
| 1  | -6.347995000 | -1.645711000 | 0.600236000  |
| 1  | -7.120851000 | -3.651315000 | 1.826415000  |
| 1  | -8.565322000 | -2.760918000 | 1.270885000  |
| 1  | -8.048250000 | -4.233199000 | 0.401767000  |

|    |              |               |              |
|----|--------------|---------------|--------------|
| 1  | -7.139646000 | -1.098400000  | -1.736178000 |
| 1  | -8.237128000 | -2.516609000  | -1.700800000 |
| 1  | -8.496256000 | -1.159108000  | -0.569626000 |
| 15 | -3.425747000 | -5.955285000  | -2.216908000 |
| 6  | -2.396398000 | -5.906736000  | -3.772913000 |
| 6  | -2.954659000 | -5.484004000  | -4.993125000 |
| 6  | -1.042426000 | -6.311829000  | -3.746901000 |
| 6  | -2.174576000 | -5.446209000  | -6.161670000 |
| 1  | -4.009467000 | -5.179773000  | -5.027549000 |
| 6  | -0.265364000 | -6.275830000  | -4.912653000 |
| 1  | -0.590788000 | -6.678652000  | -2.811616000 |
| 6  | -0.829365000 | -5.838781000  | -6.123827000 |
| 1  | -2.628140000 | -5.109317000  | -7.106166000 |
| 1  | 0.787316000  | -6.596391000  | -4.876938000 |
| 1  | -0.218081000 | -5.810489000  | -7.038854000 |
| 6  | -3.182664000 | -7.723567000  | -1.693072000 |
| 6  | -3.210228000 | -8.092086000  | -0.331375000 |
| 6  | -3.096955000 | -8.737516000  | -2.671533000 |
| 6  | -3.127472000 | -9.442421000  | 0.041626000  |
| 1  | -3.317138000 | -7.332177000  | 0.457393000  |
| 6  | -3.020259000 | -10.086347000 | -2.293621000 |
| 1  | -3.094396000 | -8.474758000  | -3.739578000 |
| 6  | -3.029038000 | -10.443577000 | -0.936393000 |
| 1  | -3.148106000 | -9.709839000  | 1.109258000  |
| 1  | -2.954919000 | -10.863667000 | -3.070322000 |
| 1  | -2.967330000 | -11.502236000 | -0.641544000 |
| 74 | -5.904359000 | -5.356688000  | -2.341361000 |
| 6  | -7.871438000 | -5.071515000  | -2.361032000 |
| 6  | -6.111852000 | -6.854999000  | -3.636370000 |
| 6  | -5.865812000 | -4.065701000  | -3.914614000 |
| 6  | -6.287479000 | -6.673936000  | -0.842302000 |
| 8  | -9.037166000 | -4.949902000  | -2.389933000 |
| 8  | -6.226309000 | -7.728851000  | -4.406899000 |
| 8  | -5.963193000 | -3.343895000  | -4.828665000 |
| 8  | -6.611539000 | -7.449759000  | -0.030786000 |
| 6  | -2.321430000 | -5.034052000  | -1.000685000 |
| 1  | -1.290458000 | -5.094344000  | -1.402925000 |
| 1  | -2.319554000 | -5.616600000  | -0.061000000 |
| 6  | -2.818307000 | -2.698714000  | -1.977935000 |
| 1  | -1.965230000 | -2.011379000  | -2.144321000 |
| 1  | -2.901694000 | -3.323914000  | -2.889880000 |
| 6  | -2.641306000 | -3.554356000  | -0.698022000 |
| 1  | -1.753556000 | -3.173536000  | -0.150368000 |

**3b-4**

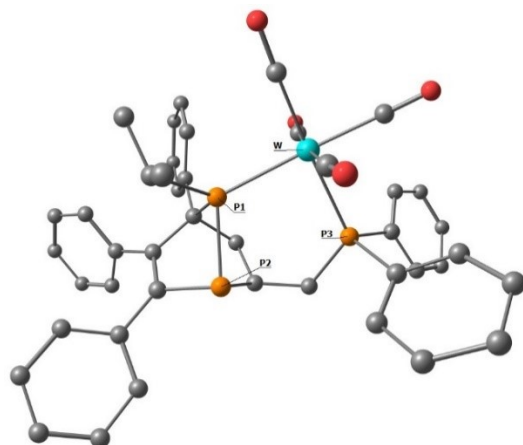

Charge : 0

Multiplicity : 1

Total energy: -19617.76460584 a.u.

|    |              |              |              |
|----|--------------|--------------|--------------|
| 6  | 0.373076000  | -5.224021000 | -2.590832000 |
| 6  | 1.188800000  | -4.814251000 | -1.344665000 |
| 6  | 0.503514000  | -4.813405000 | -0.153470000 |
| 6  | 2.599991000  | -4.349824000 | -1.463374000 |
| 6  | 3.621819000  | -5.195165000 | -1.953311000 |
| 6  | 2.945348000  | -3.035449000 | -1.073219000 |
| 6  | 4.946823000  | -4.744066000 | -2.034791000 |
| 1  | 3.375672000  | -6.220117000 | -2.267017000 |
| 6  | 4.268410000  | -2.581368000 | -1.167922000 |
| 1  | 2.159664000  | -2.367408000 | -0.689011000 |
| 6  | 5.275188000  | -3.435312000 | -1.646078000 |
| 1  | 5.728933000  | -5.420982000 | -2.411232000 |
| 1  | 4.514754000  | -1.552748000 | -0.862653000 |
| 1  | 6.314786000  | -3.080783000 | -1.717781000 |
| 6  | 1.025105000  | -4.497512000 | 1.196437000  |
| 6  | 0.213895000  | -3.806490000 | 2.129503000  |
| 6  | 2.311680000  | -4.913573000 | 1.620964000  |
| 6  | 0.676900000  | -3.514849000 | 3.419780000  |
| 1  | -0.799181000 | -3.490605000 | 1.833465000  |
| 6  | 2.768710000  | -4.631496000 | 2.914552000  |
| 1  | 2.953956000  | -5.476368000 | 0.928797000  |
| 6  | 1.958646000  | -3.924816000 | 3.818845000  |
| 1  | 0.027669000  | -2.968226000 | 4.120919000  |
| 1  | 3.768987000  | -4.973693000 | 3.221785000  |
| 1  | 2.321472000  | -3.704239000 | 4.834304000  |
| 6  | 1.150036000  | -5.411180000 | -3.893684000 |
| 6  | 1.839784000  | -4.313264000 | -4.461103000 |
| 6  | 1.162146000  | -6.625206000 | -4.607172000 |
| 6  | 2.526760000  | -4.434851000 | -5.676222000 |
| 1  | 1.854246000  | -3.344469000 | -3.940370000 |
| 6  | 1.847055000  | -6.751693000 | -5.826731000 |
| 1  | 0.597993000  | -7.487278000 | -4.226315000 |
| 6  | 2.537830000  | -5.658187000 | -6.364981000 |
| 1  | 3.058005000  | -3.562911000 | -6.087780000 |
| 1  | 1.826038000  | -7.714105000 | -6.360054000 |
| 1  | 3.074360000  | -5.753911000 | -7.321270000 |
| 15 | -1.286896000 | -5.325172000 | -0.316997000 |
| 15 | -0.748443000 | -6.704392000 | -2.005677000 |
| 6  | 0.346152000  | -7.958922000 | -1.089051000 |
| 6  | 1.261552000  | -8.798136000 | -1.988569000 |
| 6  | -0.535044000 | -8.854918000 | -0.207269000 |
| 1  | 0.981044000  | -7.329628000 | -0.430846000 |
| 1  | 1.993512000  | -8.182509000 | -2.544899000 |
| 1  | 1.835891000  | -9.506457000 | -1.354821000 |
| 1  | 0.690404000  | -9.404615000 | -2.719273000 |
| 1  | -1.219944000 | -8.276777000 | 0.444599000  |
| 1  | -1.148950000 | -9.547975000 | -0.815438000 |
| 1  | 0.112177000  | -9.472911000 | 0.449377000  |
| 6  | -5.328918000 | -5.759460000 | -1.414799000 |
| 6  | -5.071247000 | -5.624908000 | -0.035742000 |
| 6  | -6.548967000 | -6.337869000 | -1.829223000 |
| 6  | -6.022414000 | -6.042412000 | 0.909628000  |
| 1  | -4.112029000 | -5.215314000 | 0.317352000  |
| 6  | -7.495273000 | -6.753103000 | -0.881686000 |
| 1  | -6.761778000 | -6.468797000 | -2.901126000 |
| 6  | -7.237487000 | -6.603464000 | 0.490722000  |
| 1  | -5.804075000 | -5.932006000 | 1.982930000  |
| 1  | -8.442065000 | -7.200295000 | -1.221346000 |

|    |              |               |              |
|----|--------------|---------------|--------------|
| 1  | -7.980890000 | -6.932345000  | 1.232731000  |
| 6  | -1.860879000 | -9.159140000  | -3.874803000 |
| 6  | -4.387664000 | -8.068547000  | -4.333779000 |
| 6  | -2.084843000 | -6.658108000  | -5.123954000 |
| 8  | -1.364923000 | -10.173843000 | -4.192610000 |
| 8  | -5.345150000 | -8.454795000  | -4.887271000 |
| 8  | -1.744523000 | -6.275225000  | -6.174201000 |
| 6  | -1.680228000 | -3.965711000  | -1.613237000 |
| 1  | -1.413725000 | -3.038868000  | -1.063237000 |
| 6  | -3.166910000 | -3.838382000  | -1.980750000 |
| 1  | -3.276356000 | -3.048046000  | -2.752034000 |
| 1  | -3.755823000 | -3.502586000  | -1.103648000 |
| 6  | -0.732157000 | -4.129841000  | -2.823226000 |
| 1  | -1.304877000 | -4.422254000  | -3.727524000 |
| 1  | -0.232655000 | -3.169940000  | -3.064759000 |
| 15 | -4.053493000 | -5.352495000  | -2.702389000 |
| 6  | -5.110619000 | -4.499865000  | -3.976363000 |
| 6  | -5.012467000 | -4.820269000  | -5.342704000 |
| 6  | -6.009716000 | -3.486526000  | -3.572190000 |
| 6  | -5.792120000 | -4.136526000  | -6.291380000 |
| 1  | -4.323754000 | -5.609616000  | -5.671165000 |
| 6  | -6.785771000 | -2.806014000  | -4.520115000 |
| 1  | -6.115936000 | -3.236216000  | -2.505117000 |
| 6  | -6.677982000 | -3.129447000  | -5.883667000 |
| 1  | -5.704587000 | -4.400552000  | -7.356239000 |
| 1  | -7.484488000 | -2.021087000  | -4.191646000 |
| 1  | -7.290678000 | -2.596925000  | -6.627152000 |
| 74 | -2.754198000 | -7.457051000  | -3.375544000 |
| 6  | -3.514061000 | -8.387617000  | -1.730058000 |
| 8  | -3.987278000 | -8.969054000  | -0.837358000 |

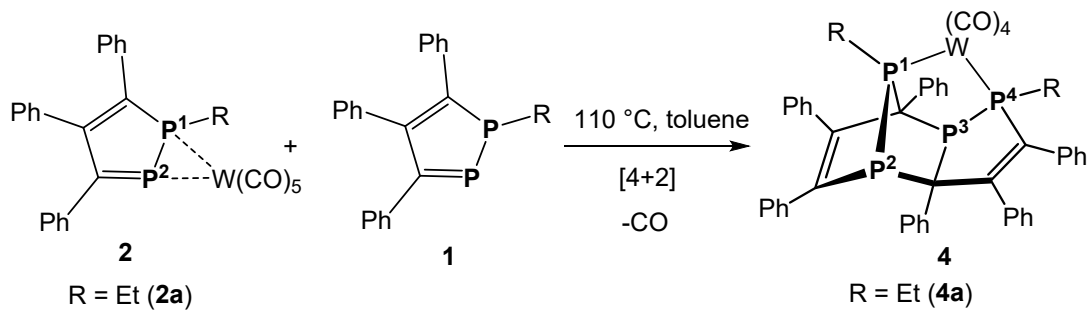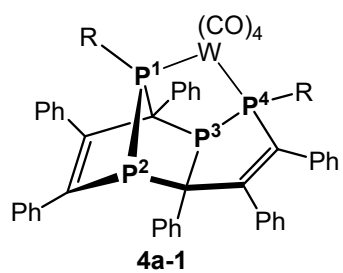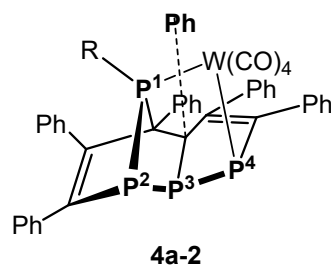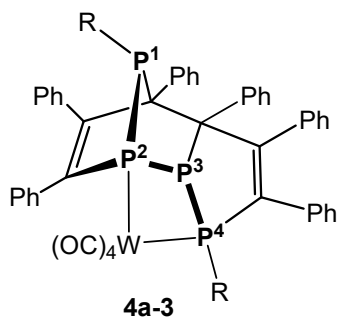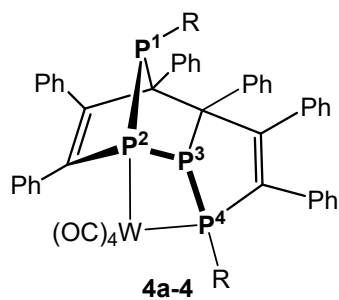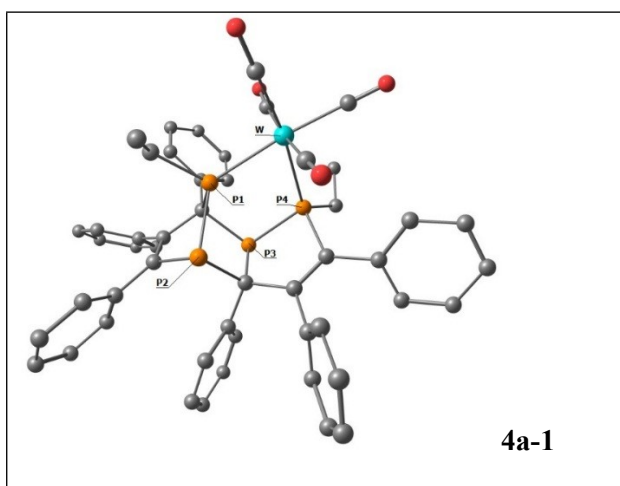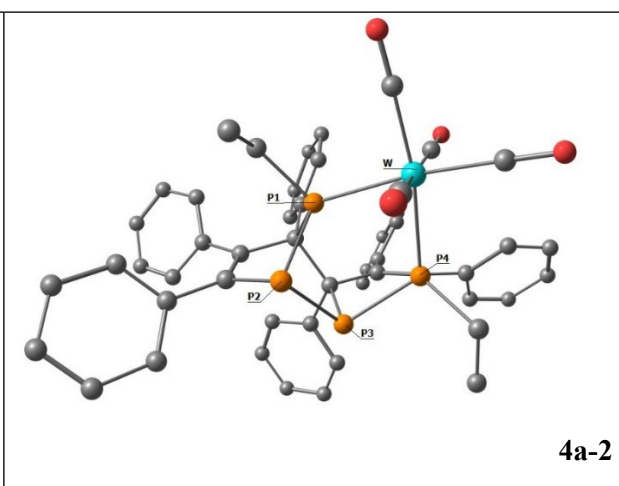

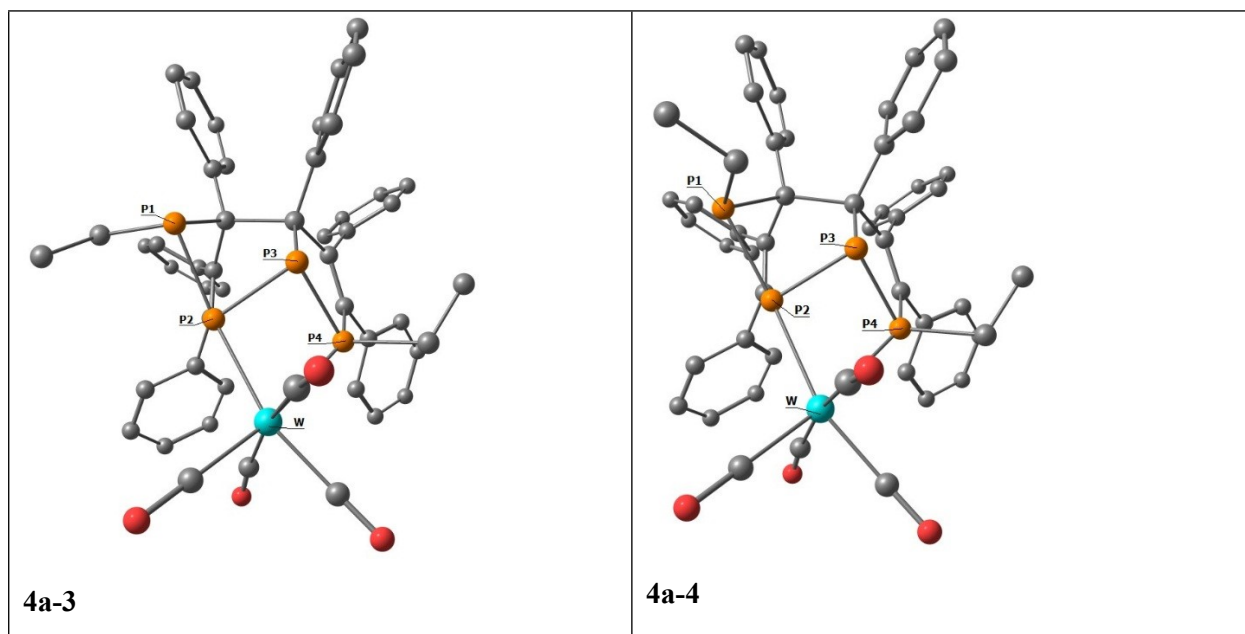

Figure S8. Optimized geometries of possible isomers of complex **4a**. H atoms are omitted for clarity.

Table S5. Total and relative energies of possible isomers of **4a**

| Compound    | $E_{\text{Tot}}$ , a.u. | $E_{\text{rel}}$ , kcal/mol |
|-------------|-------------------------|-----------------------------|
| <b>4a-1</b> | -20228.46764892         | 0.0                         |
| <b>4a-2</b> | -20228.44273605         | 15.63                       |
| <b>4a-3</b> | -20228.391907617        | 47.53                       |
| <b>4a-4</b> | -20228.388520814        | 49.65                       |

Table S6. Cartesian coordinates and total energies of possible stereoisomers of **4a**.

| <b>4a-1</b>                        |              |              |              |
|------------------------------------|--------------|--------------|--------------|
|                                    |              |              |              |
| Charge : 0                         |              |              |              |
| Multiplicity : 1                   |              |              |              |
| Total energy: -20228.46764892 a.u. |              |              |              |
| 74                                 | 2.887107000  | 0.277547000  | 12.424804000 |
| 15                                 | 1.204940000  | 1.564556000  | 13.794822000 |
| 15                                 | -0.953394000 | 1.058191000  | 13.335056000 |
| 15                                 | 0.760141000  | -0.154160000 | 11.191415000 |
| 15                                 | -0.480978000 | 1.475177000  | 10.235107000 |
| 8                                  | 3.578248000  | 2.715576000  | 10.474825000 |
| 8                                  | 5.399399000  | 1.022257000  | 14.204540000 |
| 8                                  | 4.649930000  | -1.483868000 | 10.479887000 |
| 8                                  | 2.764160000  | -2.425752000 | 14.139102000 |
| 6                                  | 0.937239000  | 3.311132000  | 13.236633000 |
| 6                                  | -0.040565000 | 3.498024000  | 12.295475000 |
| 6                                  | -1.005774000 | 2.356192000  | 11.928050000 |
| 6                                  | -0.796033000 | -0.545837000 | 12.273198000 |
| 6                                  | -1.973733000 | -0.579455000 | 11.293196000 |
| 6                                  | -1.948481000 | 0.309755000  | 10.244816000 |
| 6                                  | 1.275583000  | 1.703224000  | 15.663966000 |
| 1                                  | 1.867490000  | 2.624572000  | 15.847779000 |
| 1                                  | 0.244525000  | 1.908591000  | 16.020461000 |
| 6                                  | 1.907343000  | 0.510654000  | 16.379547000 |
| 1                                  | 1.371315000  | -0.438116000 | 16.181543000 |
| 1                                  | 1.902123000  | 0.679258000  | 17.475674000 |
| 1                                  | 2.960423000  | 0.367158000  | 16.067886000 |
| 6                                  | 1.824208000  | 4.372774000  | 13.781965000 |
| 6                                  | 3.225533000  | 4.202777000  | 13.879267000 |
| 1                                  | 3.684974000  | 3.279972000  | 13.499964000 |
| 6                                  | 4.034800000  | 5.199189000  | 14.443304000 |
| 1                                  | 5.122881000  | 5.042431000  | 14.498255000 |
| 6                                  | 3.463959000  | 6.384082000  | 14.932622000 |
| 1                                  | 4.100073000  | 7.165320000  | 15.376111000 |
| 6                                  | 2.072679000  | 6.560392000  | 14.859264000 |
| 1                                  | 1.610595000  | 7.479978000  | 15.250379000 |
| 6                                  | 1.261774000  | 5.566789000  | 14.295270000 |
| 1                                  | 0.172351000  | 5.707355000  | 14.257276000 |
| 6                                  | -0.126532000 | 4.791949000  | 11.541723000 |
| 6                                  | 0.867903000  | 5.088592000  | 10.582500000 |
| 1                                  | 1.679680000  | 4.368411000  | 10.404180000 |
| 6                                  | 0.833826000  | 6.295029000  | 9.866596000  |
| 1                                  | 1.617886000  | 6.506503000  | 9.123479000  |

|   |              |              |              |
|---|--------------|--------------|--------------|
| 6 | -0.186198000 | 7.229051000  | 10.102557000 |
| 1 | -0.209115000 | 8.178045000  | 9.544963000  |
| 6 | -1.175060000 | 6.948540000  | 11.059124000 |
| 1 | -1.975594000 | 7.677813000  | 11.257463000 |
| 6 | -1.150804000 | 5.738797000  | 11.767860000 |
| 1 | -1.930987000 | 5.529310000  | 12.514393000 |
| 6 | -2.434902000 | 2.901824000  | 11.739345000 |
| 6 | -2.838045000 | 3.465624000  | 10.508197000 |
| 1 | -2.139833000 | 3.471804000  | 9.656981000  |
| 6 | -4.111462000 | 4.028847000  | 10.347167000 |
| 1 | -4.396030000 | 4.450470000  | 9.371366000  |
| 6 | -5.015125000 | 4.054357000  | 11.420026000 |
| 1 | -6.015886000 | 4.495483000  | 11.294935000 |
| 6 | -4.629356000 | 3.508504000  | 12.653499000 |
| 1 | -5.324939000 | 3.520884000  | 13.506928000 |
| 6 | -3.354783000 | 2.940042000  | 12.809732000 |
| 1 | -3.069072000 | 2.517533000  | 13.784903000 |
| 6 | 0.806317000  | -1.399814000 | 9.789224000  |
| 1 | 1.301734000  | -2.293710000 | 10.220317000 |
| 1 | -0.232502000 | -1.674811000 | 9.517316000  |
| 6 | 1.581642000  | -0.900321000 | 8.565832000  |
| 1 | 1.102152000  | -0.012789000 | 8.105583000  |
| 1 | 1.625312000  | -1.697685000 | 7.796052000  |
| 1 | 2.624243000  | -0.628987000 | 8.819850000  |
| 6 | -0.620746000 | -1.790032000 | 13.133967000 |
| 6 | -0.631699000 | -1.746199000 | 14.543866000 |
| 1 | -0.809929000 | -0.788396000 | 15.057040000 |
| 6 | -0.449241000 | -2.905660000 | 15.313637000 |
| 1 | -0.459242000 | -2.834714000 | 16.412096000 |
| 6 | -0.257043000 | -4.144280000 | 14.688195000 |
| 1 | -0.107949000 | -5.054362000 | 15.288523000 |
| 6 | -0.264202000 | -4.212140000 | 13.286074000 |
| 1 | -0.127743000 | -5.179549000 | 12.779156000 |
| 6 | -0.447127000 | -3.053151000 | 12.521462000 |
| 1 | -0.472829000 | -3.137647000 | 11.426435000 |
| 6 | -3.067520000 | -1.569301000 | 11.507180000 |
| 6 | -3.762400000 | -1.628159000 | 12.736500000 |
| 1 | -3.495225000 | -0.930470000 | 13.544812000 |
| 6 | -4.795681000 | -2.555855000 | 12.930078000 |
| 1 | -5.330627000 | -2.581188000 | 13.891851000 |
| 6 | -5.143347000 | -3.452448000 | 11.906971000 |
| 1 | -5.948939000 | -4.185999000 | 12.063500000 |
| 6 | -4.452324000 | -3.411388000 | 10.685263000 |
| 1 | -4.713269000 | -4.114249000 | 9.879150000  |
| 6 | -3.427056000 | -2.476884000 | 10.485583000 |
| 1 | -2.891456000 | -2.446783000 | 9.524550000  |
| 6 | -2.986466000 | 0.488891000  | 9.202177000  |
| 6 | -4.367949000 | 0.504838000  | 9.513238000  |
| 1 | -4.686478000 | 0.394912000  | 10.559291000 |
| 6 | -5.326228000 | 0.689067000  | 8.509227000  |
| 1 | -6.394099000 | 0.706993000  | 8.776378000  |
| 6 | -4.932703000 | 0.861542000  | 7.171241000  |
| 1 | -5.689007000 | 1.005357000  | 6.384390000  |
| 6 | -3.566838000 | 0.861340000  | 6.847724000  |
| 1 | -3.244901000 | 1.002687000  | 5.804512000  |
| 6 | -2.605054000 | 0.686127000  | 7.852946000  |
| 1 | -1.535240000 | 0.696034000  | 7.591389000  |
| 6 | 3.292323000  | 1.851298000  | 11.207420000 |



|   |             |              |              |
|---|-------------|--------------|--------------|
| 6 | 4.472942000 | 0.743441000  | 13.544625000 |
| 6 | 4.001936000 | -0.823829000 | 11.199188000 |
| 6 | 2.726049000 | -1.426879000 | 13.538818000 |

**4a-2**

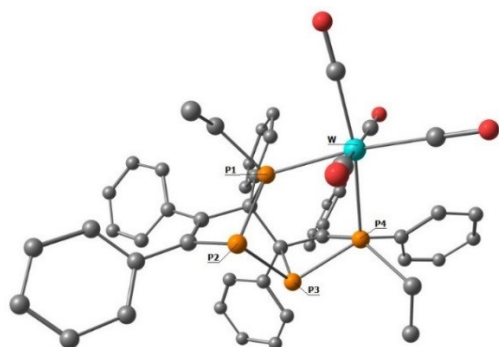

Charge : 0  
 Multiplicity : 1  
 Total energy: -20228.44273605 a.u.

|    |              |              |              |
|----|--------------|--------------|--------------|
| 6  | -3.476097000 | 0.088292000  | 0.212043000  |
| 6  | -3.588395000 | 1.457446000  | 0.272746000  |
| 15 | -0.864119000 | 0.292319000  | -1.486439000 |
| 15 | 1.142948000  | 0.935902000  | -0.702631000 |
| 6  | -4.562634000 | -0.922684000 | 0.316298000  |
| 6  | -4.657089000 | -1.956161000 | -0.644125000 |
| 6  | -5.468658000 | -0.929854000 | 1.402674000  |
| 6  | -5.645287000 | -2.945705000 | -0.540026000 |
| 1  | -3.949714000 | -1.974751000 | -1.488438000 |
| 6  | -6.446566000 | -1.927829000 | 1.511776000  |
| 1  | -5.399050000 | -0.144434000 | 2.169605000  |
| 6  | -6.543952000 | -2.935627000 | 0.538491000  |
| 1  | -5.707994000 | -3.734728000 | -1.305039000 |
| 1  | -7.137814000 | -1.919735000 | 2.368521000  |
| 1  | -7.313527000 | -3.717700000 | 0.625553000  |
| 6  | -4.931571000 | 2.082284000  | 0.509684000  |
| 6  | -5.162674000 | 2.960338000  | 1.595938000  |
| 6  | -6.041640000 | 1.728897000  | -0.297740000 |
| 6  | -6.447395000 | 3.458279000  | 1.862519000  |
| 1  | -4.332062000 | 3.257798000  | 2.249910000  |
| 6  | -7.320948000 | 2.236140000  | -0.037201000 |
| 1  | -5.892135000 | 1.043763000  | -1.144395000 |
| 6  | -7.531656000 | 3.103803000  | 1.046680000  |
| 1  | -6.596043000 | 4.134546000  | 2.718155000  |
| 1  | -8.161810000 | 1.945317000  | -0.685417000 |
| 1  | -8.536880000 | 3.501478000  | 1.253777000  |
| 6  | -2.346193000 | 3.731430000  | 0.647218000  |
| 6  | -3.148341000 | 4.685562000  | -0.022325000 |
| 6  | -1.635394000 | 4.183544000  | 1.779015000  |
| 6  | -3.248634000 | 6.007113000  | 0.431203000  |
| 1  | -3.704150000 | 4.407286000  | -0.924234000 |
| 6  | -1.730375000 | 5.505981000  | 2.241005000  |
| 1  | -0.961804000 | 3.498654000  | 2.314232000  |
| 6  | -2.546474000 | 6.426140000  | 1.571378000  |
| 1  | -3.880848000 | 6.717522000  | -0.122338000 |
| 1  | -1.150892000 | 5.810857000  | 3.125491000  |
| 1  | -2.626021000 | 7.464878000  | 1.926508000  |
| 6  | -2.168361000 | 1.135141000  | 3.029462000  |
| 6  | -2.100445000 | -0.218717000 | 3.740123000  |
| 1  | -3.216422000 | 1.399025000  | 2.790075000  |
| 1  | -1.765298000 | 1.934583000  | 3.683228000  |
| 1  | -2.621051000 | -0.157987000 | 4.717458000  |
| 1  | -2.589180000 | -1.018559000 | 3.148174000  |

|             |              |              |                                |
|-------------|--------------|--------------|--------------------------------|
| 1           | -1.057468000 | -0.533157000 | 3.940359000                    |
| 6           | 2.374506000  | -0.033551000 | -1.715822000                   |
| 6           | 2.171432000  | -0.068006000 | -3.228358000                   |
| 1           | 2.354070000  | -1.050489000 | -1.269212000                   |
| 1           | 3.361539000  | 0.395895000  | -1.443397000                   |
| 1           | 2.955196000  | -0.688899000 | -3.708283000                   |
| 1           | 1.187206000  | -0.500181000 | -3.499361000                   |
| 1           | 2.233937000  | 0.947242000  | -3.668578000                   |
| 6           | -2.256073000 | 2.268377000  | 0.185423000                    |
| 6           | -0.361371000 | 3.071417000  | -1.546942000                   |
| 6           | 0.925366000  | 2.586467000  | -1.509807000                   |
| 6           | -1.564846000 | 2.109941000  | -1.296666000                   |
| 6           | 2.144796000  | 3.290043000  | -1.987998000                   |
| 6           | 3.363267000  | 3.252530000  | -1.268501000                   |
| 6           | 2.135186000  | 3.952015000  | -3.241463000                   |
| 6           | 4.517571000  | 3.871295000  | -1.769720000                   |
| 1           | 3.401854000  | 2.742661000  | -0.295111000                   |
| 6           | 3.290280000  | 4.565616000  | -3.741246000                   |
| 1           | 1.206021000  | 3.979037000  | -3.828638000                   |
| 6           | 4.487266000  | 4.533287000  | -3.006257000                   |
| 1           | 5.447817000  | 3.834902000  | -1.182545000                   |
| 1           | 3.254896000  | 5.072913000  | -4.717672000                   |
| 1           | 5.393726000  | 5.018394000  | -3.399275000                   |
| 6           | -0.578986000 | 4.535182000  | -1.819063000                   |
| 6           | 0.095295000  | 5.463189000  | -0.986510000                   |
| 6           | -1.367076000 | 5.054957000  | -2.874487000                   |
| 6           | -0.025791000 | 6.843509000  | -1.185414000                   |
| 1           | 0.712624000  | 5.091644000  | -0.158146000                   |
| 6           | -1.480901000 | 6.439335000  | -3.074977000                   |
| 1           | -1.879664000 | 4.381463000  | -3.570611000                   |
| 6           | -0.817308000 | 7.342169000  | -2.231720000                   |
| 1           | 0.504555000  | 7.533682000  | -0.511665000                   |
| 1           | -2.092707000 | 6.811567000  | -3.911427000                   |
| 1           | -0.911125000 | 8.427240000  | -2.392536000                   |
| 6           | -2.472826000 | 2.194550000  | -2.554299000                   |
| 6           | -1.872416000 | 1.896765000  | -3.807435000                   |
| 6           | -3.830551000 | 2.557867000  | -2.580574000                   |
| 6           | -2.587338000 | 1.967208000  | -5.008333000                   |
| 1           | -0.808259000 | 1.619982000  | -3.845880000                   |
| 6           | -4.557915000 | 2.625266000  | -3.782817000                   |
| 1           | -4.358102000 | 2.801938000  | -1.656151000                   |
| 6           | -3.944097000 | 2.333076000  | -5.005989000                   |
| 1           | -2.077001000 | 1.732654000  | -5.955020000                   |
| 1           | -5.619875000 | 2.913801000  | -3.746982000                   |
| 1           | -4.512025000 | 2.386628000  | -5.947111000                   |
| 15          | -1.753718000 | -0.623545000 | 0.347509000                    |
| 15          | -1.138156000 | 1.204365000  | 1.457887000                    |
| 74          | 1.361650000  | 1.142682000  | 1.790393000                    |
| 6           | 3.340575000  | 0.904842000  | 1.853931000                    |
| 6           | 1.264501000  | -0.876148000 | 2.060276000                    |
| 6           | 1.197495000  | 1.327566000  | 3.765276000                    |
| 6           | 1.691642000  | 3.145795000  | 1.772479000                    |
| 8           | 1.286264000  | -2.019660000 | 2.291234000                    |
| 8           | 4.502760000  | 0.763391000  | 1.871474000                    |
| 8           | 1.068560000  | 1.435993000  | 4.924897000                    |
| 8           | 1.941479000  | 4.284974000  | 1.853053000                    |
| <b>4a-3</b> |              |              | Charge : 0<br>Multiplicity : 1 |

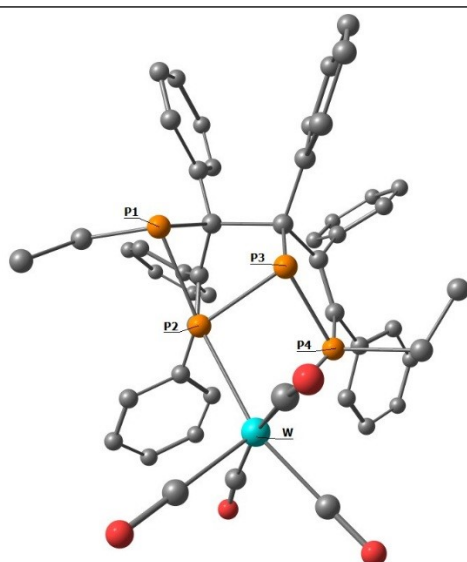

Total energy: -20228.391907617 a.u.

|    |              |              |              |
|----|--------------|--------------|--------------|
| 6  | -3.603313000 | 0.198870000  | -0.163699000 |
| 6  | -3.662042000 | 1.550187000  | -0.388028000 |
| 15 | -1.315766000 | 1.565676000  | 1.157445000  |
| 15 | -0.376181000 | 0.301272000  | -1.161046000 |
| 15 | -1.251506000 | -1.212881000 | -2.458045000 |
| 6  | -4.752378000 | -0.724779000 | 0.025450000  |
| 6  | -5.607262000 | -1.124892000 | -1.025002000 |
| 6  | -5.011002000 | -1.227461000 | 1.323786000  |
| 6  | -6.698748000 | -1.970282000 | -0.781959000 |
| 6  | -6.105317000 | -2.067974000 | 1.567014000  |
| 6  | -6.956384000 | -2.439303000 | 0.514352000  |
| 6  | -5.000150000 | 2.231099000  | -0.398756000 |
| 6  | -5.353108000 | 3.091790000  | 0.669214000  |
| 6  | -5.980224000 | 1.975401000  | -1.382905000 |
| 6  | -6.626990000 | 3.670084000  | 0.744800000  |
| 6  | -7.252742000 | 2.565458000  | -1.316377000 |
| 6  | -7.582390000 | 3.416308000  | -0.252179000 |
| 6  | -2.399902000 | 3.817290000  | -0.243285000 |
| 6  | -3.324012000 | 4.597880000  | -0.977681000 |
| 6  | -1.513351000 | 4.512000000  | 0.609654000  |
| 6  | -3.377405000 | 5.991692000  | -0.840572000 |
| 6  | -1.561565000 | 5.906926000  | 0.752872000  |
| 6  | -2.501819000 | 6.655993000  | 0.031910000  |
| 6  | -2.511942000 | 1.809895000  | 2.585078000  |
| 6  | -2.062798000 | 1.011703000  | 3.813712000  |
| 6  | -2.313308000 | 2.297688000  | -0.389344000 |
| 6  | -2.136306000 | 1.383943000  | -3.019833000 |
| 6  | -2.331848000 | 0.047606000  | -3.320351000 |
| 6  | -1.333544000 | 1.849514000  | -1.768787000 |
| 15 | -1.917050000 | -0.432596000 | 0.305863000  |
| 74 | -1.374784000 | -2.853534000 | -0.439587000 |
| 6  | -0.950566000 | -4.436037000 | -1.530780000 |
| 6  | -3.280430000 | -3.556636000 | -0.589086000 |
| 6  | -1.290578000 | -3.821191000 | 1.288213000  |
| 6  | 0.633017000  | -2.615471000 | -0.235464000 |
| 8  | -1.243513000 | -4.390204000 | 2.310134000  |
| 8  | -0.691512000 | -5.367451000 | -2.194494000 |
| 8  | 1.794413000  | -2.612955000 | -0.111123000 |
| 8  | -4.286451000 | -4.141753000 | -0.679042000 |
| 6  | -3.170808000 | -0.558512000 | -4.399022000 |
| 6  | -3.338348000 | -0.033386000 | -5.705480000 |

|   |              |              |              |
|---|--------------|--------------|--------------|
| 6 | -3.810930000 | -1.793665000 | -4.109195000 |
| 6 | -4.122189000 | -0.702204000 | -6.656845000 |
| 6 | -4.605110000 | -2.451870000 | -5.057539000 |
| 6 | -4.768000000 | -1.907069000 | -6.340272000 |
| 6 | -2.614542000 | 2.400158000  | -4.023795000 |
| 6 | -1.706001000 | 2.824578000  | -5.024893000 |
| 6 | -3.928427000 | 2.903589000  | -4.066443000 |
| 6 | -2.099342000 | 3.726912000  | -6.022569000 |
| 6 | -4.324138000 | 3.808177000  | -5.066464000 |
| 6 | -3.412770000 | 4.225496000  | -6.046928000 |
| 6 | -0.311397000 | 2.980876000  | -2.052161000 |
| 6 | 1.058803000  | 2.831030000  | -1.730466000 |
| 6 | -0.688239000 | 4.225721000  | -2.615345000 |
| 6 | 1.998593000  | 3.847569000  | -1.964832000 |
| 6 | 0.244997000  | 5.244791000  | -2.851458000 |
| 6 | 1.598082000  | 5.064219000  | -2.531041000 |
| 6 | -0.046326000 | -1.655175000 | -3.819357000 |
| 6 | 0.552416000  | -0.518996000 | -4.641971000 |

**4a-4**

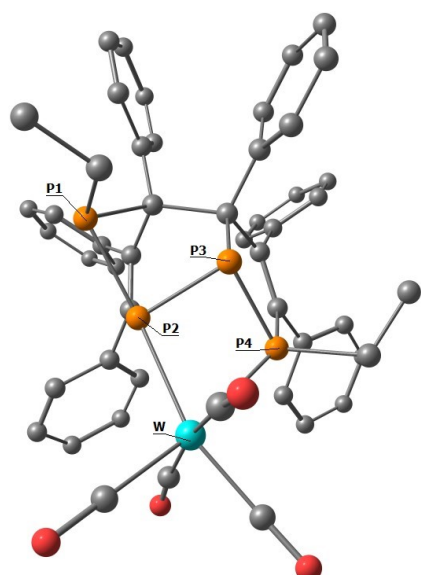

Charge : 0  
 Multiplicity : 1  
 Total energy: -20228.388520814 a.u.

|    |              |              |              |
|----|--------------|--------------|--------------|
| 6  | -3.549319000 | 0.334708000  | -0.222661000 |
| 6  | -3.598361000 | 1.697691000  | -0.385357000 |
| 15 | -1.646801000 | 1.702574000  | 1.321367000  |
| 15 | -0.303903000 | 0.397995000  | -1.099398000 |
| 15 | -1.047531000 | -1.185735000 | -2.391792000 |
| 6  | -4.711842000 | -0.570791000 | -0.050822000 |
| 6  | -5.571820000 | -0.891843000 | -1.124859000 |
| 6  | -4.977488000 | -1.141194000 | 1.216880000  |
| 6  | -6.671100000 | -1.741021000 | -0.934769000 |
| 1  | -5.357088000 | -0.490784000 | -2.125813000 |
| 6  | -6.080941000 | -1.983311000 | 1.406181000  |
| 1  | -4.318400000 | -0.904171000 | 2.066324000  |
| 6  | -6.931703000 | -2.286229000 | 0.331067000  |
| 1  | -7.322782000 | -1.986042000 | -1.787336000 |
| 1  | -6.274972000 | -2.409699000 | 2.402066000  |
| 1  | -7.791983000 | -2.956514000 | 0.478701000  |
| 6  | -4.889554000 | 2.427202000  | -0.132005000 |
| 6  | -4.976224000 | 3.227765000  | 1.034718000  |
| 6  | -6.055710000 | 2.284238000  | -0.913229000 |
| 6  | -6.168672000 | 3.871613000  | 1.386051000  |
| 1  | -4.092987000 | 3.327943000  | 1.682258000  |

|    |              |              |              |
|----|--------------|--------------|--------------|
| 6  | -7.249911000 | 2.936438000  | -0.565849000 |
| 1  | -6.046096000 | 1.644482000  | -1.803899000 |
| 6  | -7.311960000 | 3.738132000  | 0.581746000  |
| 1  | -6.203699000 | 4.480574000  | 2.302356000  |
| 1  | -8.140794000 | 2.804685000  | -1.198902000 |
| 1  | -8.248648000 | 4.247230000  | 0.855474000  |
| 6  | -2.325838000 | 3.936531000  | -0.372090000 |
| 6  | -3.282011000 | 4.657406000  | -1.125978000 |
| 6  | -1.456983000 | 4.685589000  | 0.447894000  |
| 6  | -3.370923000 | 6.053594000  | -1.051071000 |
| 1  | -3.966281000 | 4.122595000  | -1.797213000 |
| 6  | -1.541407000 | 6.084963000  | 0.529280000  |
| 1  | -0.681195000 | 4.178141000  | 1.036099000  |
| 6  | -2.502792000 | 6.777632000  | -0.218440000 |
| 1  | -4.130153000 | 6.578172000  | -1.651057000 |
| 1  | -0.845085000 | 6.632169000  | 1.182804000  |
| 1  | -2.575296000 | 7.874148000  | -0.155220000 |
| 6  | 0.221304000  | 1.874953000  | 1.623672000  |
| 6  | 0.501558000  | 2.537504000  | 2.978464000  |
| 1  | 0.711570000  | 2.422096000  | 0.793107000  |
| 1  | 0.646479000  | 0.848710000  | 1.599090000  |
| 1  | 1.592247000  | 2.572334000  | 3.178003000  |
| 1  | 0.121002000  | 3.578818000  | 3.022953000  |
| 1  | 0.025655000  | 1.980641000  | 3.810892000  |
| 6  | -2.227583000 | 2.414171000  | -0.454219000 |
| 6  | -2.070583000 | 1.350691000  | -3.012914000 |
| 6  | -2.145231000 | 0.006436000  | -3.313366000 |
| 6  | -1.270104000 | 1.898423000  | -1.784678000 |
| 15 | -1.878661000 | -0.314321000 | 0.279339000  |
| 74 | -1.321150000 | -2.756934000 | -0.341551000 |
| 6  | -0.818433000 | -4.362744000 | -1.367595000 |
| 6  | -3.223207000 | -3.425627000 | -0.638502000 |
| 6  | -1.383689000 | -3.698042000 | 1.404402000  |
| 6  | 0.662841000  | -2.505674000 | 0.014651000  |
| 8  | -1.421682000 | -4.254876000 | 2.432865000  |
| 8  | -0.508237000 | -5.305377000 | -1.991602000 |
| 8  | 1.810858000  | -2.480916000 | 0.232067000  |
| 8  | -4.237137000 | -3.976231000 | -0.812579000 |
| 6  | -2.910826000 | -0.643104000 | -4.420025000 |
| 6  | -2.862097000 | -0.216605000 | -5.768859000 |
| 6  | -3.667992000 | -1.804893000 | -4.122793000 |
| 1  | -2.267271000 | 0.663771000  | -6.044126000 |
| 1  | -3.706594000 | -2.175055000 | -3.087953000 |
| 6  | -3.559835000 | -0.909150000 | -6.768866000 |
| 6  | -4.374752000 | -2.487743000 | -5.122603000 |
| 1  | -3.499342000 | -0.556982000 | -7.810192000 |
| 1  | -4.960899000 | -3.380059000 | -4.854863000 |
| 6  | -4.325580000 | -2.042067000 | -6.452392000 |
| 1  | -4.872922000 | -2.581219000 | -7.240582000 |
| 6  | -2.744907000 | 2.302214000  | -3.964209000 |
| 6  | -1.996538000 | 2.930225000  | -4.988364000 |
| 6  | -4.135575000 | 2.520632000  | -3.931849000 |
| 1  | -0.913818000 | 2.750100000  | -5.053526000 |
| 1  | -4.736744000 | 2.014978000  | -3.167154000 |
| 6  | -2.619482000 | 3.766381000  | -5.926076000 |
| 6  | -4.761482000 | 3.359582000  | -4.867963000 |
| 1  | -2.016018000 | 4.242103000  | -6.714436000 |
| 1  | -5.850520000 | 3.512316000  | -4.817343000 |

|   |              |              |              |
|---|--------------|--------------|--------------|
| 6 | -4.004786000 | 3.990418000  | -5.866089000 |
| 1 | -4.493363000 | 4.646138000  | -6.602861000 |
| 6 | -0.242506000 | 2.992936000  | -2.194257000 |
| 6 | 1.150551000  | 2.780563000  | -2.056944000 |
| 6 | -0.628656000 | 4.242375000  | -2.739017000 |
| 1 | 1.518264000  | 1.829901000  | -1.640599000 |
| 1 | -1.685821000 | 4.478893000  | -2.883130000 |
| 6 | 2.099612000  | 3.747386000  | -2.426749000 |
| 6 | 0.312404000  | 5.214323000  | -3.107733000 |
| 1 | 3.170439000  | 3.527901000  | -2.296333000 |
| 1 | -0.043236000 | 6.170762000  | -3.520800000 |
| 6 | 1.685666000  | 4.977358000  | -2.953389000 |
| 1 | 2.423546000  | 5.741913000  | -3.240888000 |
| 6 | 0.205252000  | -1.645682000 | -3.701282000 |
| 6 | 0.849623000  | -0.512884000 | -4.493710000 |
| 1 | 0.957369000  | -2.246266000 | -3.148736000 |
| 1 | -0.330374000 | -2.358720000 | -4.364842000 |
| 1 | 1.583396000  | -0.918046000 | -5.220182000 |
| 1 | 1.389585000  | 0.195630000  | -3.833179000 |
| 1 | 0.098316000  | 0.067218000  | -5.064844000 |
